# Supplementary material for: The molecular mechanism of TiaoGanYiPi formula for treatment of chronic hepatitis B by network pharmacology and molecular docking verification
Source: Research Square preprint supplement (doi:10.21203/rs.3.rs-120141/v1), 2020-12-15
Supplement: Supplementary file 1 [file 41efc5f59fa18f4f48af9713.xlsx]

## Sheet: Table 1S
Herb chinese name	Latin name	Abbreviation	Canonical SMILES	Molecule name	Common compounds
Chaihu	Radix Bupleuri	CH1	CCCCCC=CCC=CCCCCCCCCOC(=O)C	Linoleyl acetate	-
Chaihu	Radix Bupleuri	CH2	C1=CC=C(C=C1)C2=CC(=O)C3=C(C(=C(C=C3O2)OC4C(C(C(C(O4)C(=O)O)O)O)O)O)O	Baicalin	-
Chaihu	Radix Bupleuri	CH3	COC1=CC(=CC(=C1OC)OC)C2=C(C(=O)C3=C(C(=C(C=C3O2)OC)OC)OC)OC	3,5,6,7-tetramethoxy-2-(3,4,5-trimethoxyphenyl)chromone	-
Chaihu	Radix Bupleuri	CH4	COC1=C(C=C(C(=C1)C2=CC(=O)C3=C(C(=C(C=C3O2)OC)OC)O)O)O	Areapillin	-
Chaihu	Radix Bupleuri	CH5	C1C(C(C(O1)O)CC2=CC3=C(C=C2)OCO3)CC4=CC5=C(C=C4)OCO5	Cubebin	-
Chaihu	Radix Bupleuri	CH6	COC1=CC(=C(C=C1)C2=CC3=CC(=C(C=C3O2)OC)O)O	Sainfuran	-
Chaihu	Radix Bupleuri	CH7	CC1C(C(C(C(O1)OCC2C(C(C(C(O2)OC3=C(OC4=CC(=CC(=C4C3=O)O)OCCO)C5=CC(=C(C=C5)OCCO)OCCO)O)O)O)O)O)O	Troxerutin	-
Chaihu	Radix Bupleuri	CH8	CCC(C=CC(C)C1CCC2C1(CCC3C2=CCC4C3(CCC(C4)O)C)C)C(C)C	α-spinasterol	-
Chaihu	Radix Bupleuri	CH9	COC1=C(C=C2C(=C1)C=CC(=O)O2)OC	scoparone	-
Chaihu	Radix Bupleuri	CH10	CC=C(C)C(=O)OC1C(C(OC2=C1C3=C(C=C2)C=CC(=O)O3)(C)C)OC(=O)C(=CC)C	(+)-Anomalin	-
Chaihu	Radix Bupleuri	CH11	CC1(CCC2(CCC3(C(=CCC4C3(CCC5C4(CCC(C5(C)C)O)C)C)C2C1)C)C(=O)O)C	oleanolic acid	-
Chaihu	Radix Bupleuri	CH12	CC1(CCC23COC4(C2C1)C=CC5C6(CCC(C(C6CCC5(C4(CC3O)C)C)(C)CO)O)C)C	Saikogenin F	-
Chaihu	Radix Bupleuri	CH13	COC1=C(C(=C2C(=C1)C=CC(=O)O2)O)O	Fraxetin	-
Chaihu	Radix Bupleuri	CH14	C1=CC(=O)OC2=CC(=C(C=C21)O)O	esculetin	-
Chaihu	Radix Bupleuri	CH15	COC1=CC2=C(C=C1)C=CC(=O)O2	Herniarin	-
Chaihu	Radix Bupleuri	CH16	COC1=C(C=C2C(=C1)C=CC(=O)O2)O	scopoletin	-
Chaihu	Radix Bupleuri	CH17	CC1(CC(C2=C(O1)C3=CC=CC=C3OC2=O)C4=CC=CC=C4)OC	Cyclocumarol	-
Chaihu	Radix Bupleuri	CH18	C1CC2C3CC(CN2C(=O)C1)C4CC(CCN4C3)O.Cl	Octalupine	-
Chaihu	Radix Bupleuri	CH19	CC1C(C(C(C(O1)OC2CCC3(C(C2(C)CO)CCC4(C3C=CC5=C6CC(CCC6(C(CC54C)O)CO)(C)C)C)C)O)OC7C(C(C(C(O7)CO)O)O)O)O	Saikosaponin B	-
Chaihu	Radix Bupleuri	CH20	CC1C(C(C(C(O1)OC2CCC3(C(C2(C)CO)CCC4(C3C=CC56C4(CC(C7(C5CC(CC7)(C)C)CO6)O)C)C)C)O)OC8C(C(C(C(O8)CO)O)OC(=O)C)O)O	3'-O-Acetylsaikosaponin D_qt	-
Chaihu	Radix Bupleuri	CH21	COC1=C(C=CC(=C1)CC(COC2C(C(C(C(O2)CO)O)O)O)C(CC3=CC(=C(C=C3)O)OC)COC4C(C(C(C(O4)CO)O)O)O)O	Secoisolariciresinol diglucoside	-
Chaihu	Radix Bupleuri	A1	C1=CC(=C(C=C1C2=C(C(=O)C3=C(C=C(C=C3O2)O)O)O)O)O	quercetin	CH-HQ
Chaihu	Radix Bupleuri	A2	COC1=C(C=CC(=C1)C2=C(C(=O)C3=C(C=C(C=C3O2)O)O)O)O	isorhamnetin	CH-HQ
Chaihu	Radix Bupleuri	A3	C1=CC(=CC=C1C2=C(C(=O)C3=C(C=C(C=C3O2)O)O)O)O	kaempferol	CH-HQ
Chaihu	Radix Bupleuri	B1	CCC(C=CC(C)C1CCC2C1(CCC3C2CC=C4C3(CCC(C4)O)C)C)C(C)C	Stigmasterol	CH-DG
Chaihu	Radix Bupleuri	B2	C1=CC(=O)OC2=CC3=C(C=CO3)C=C21	Psoralen	CH-DG
Huangqi	Hedysarum Multijugum Maxim	HQ1	CC(=C)C1CCC2(C1C3CCC4C5(CCC(C(C5CCC4(C3(CC2)C)C)(C)C)O)C)C(=O)O	Mairin	-
Huangqi	Hedysarum Multijugum Maxim	HQ2	COC1=CC(=C2C(=C1)OC(=C(C2=O)OC)C3=CC=C(C=C3)O)O	Jaranol	-
Huangqi	Hedysarum Multijugum Maxim	HQ3	CC1(CCC2(CCC3(C(=CCC4C3(CCC5C4(CCC(C5(C)CO)O)C)C)C2C1)C)C(=O)O)C	hederagenin	-
Huangqi	Hedysarum Multijugum Maxim	HQ4	CCCC(CCC(C)C1CCC2C1(CCC3C2CC=C4C3(CCC(C4)O)C)C)C(C)C	(3S,8S,9S,10R,13R,14S,17R)-10,13-dimethyl-17-[(2R,5S)-5-propan-2-yloctan-2-yl]-2,3,4,7,8,9,11,12,14,15,16,17-dodecahydro-1H-cyclopenta[a]phenanthren-3-ol	-
Huangqi	Hedysarum Multijugum Maxim	HQ5	COC1=CC2=C(C=C1)C3C(CO2)C4=C(O3)C(=C(C=C4)OC)OC	3,9-di-O-methylnissolin	-
Huangqi	Hedysarum Multijugum Maxim	HQ6	COC1=C(C2=C(C=C1)C3COC4=C(C3O2)C=CC(=C4)OC5C(C(C(C(O5)CO)O)O)O)OC	9,10-dimethoxypterocarpan-3-O-β-D-glucoside	-
Huangqi	Hedysarum Multijugum Maxim	HQ7	COC1=C(C2=C(C=C1)C3COC4=C(C3O2)C=CC(=C4)O)OC	(6aR,11aR)-9,10-dimethoxy-6a,11a-dihydro-6H-benzofurano[3,2-c]chromen-3-ol	-
Huangqi	Hedysarum Multijugum Maxim	HQ8	COC1=C2C(=C(C(=C1)C(=O)OC)C3=C4C(=C(C=C3C(=O)OC)OC)OCO4)OCO2	Bifendate	-
Huangqi	Hedysarum Multijugum Maxim	HQ9	COC1=CC=C(C=C1)C2=COC3=C(C2=O)C=CC(=C3)O	formononetin	-
Huangqi	Hedysarum Multijugum Maxim	HQ10	C1C(C(=O)C2=CC=CC=C2O1)C3=CC=CC=C3	isoflavanone	-
Huangqi	Hedysarum Multijugum Maxim	HQ11	COC1=C(C=C(C=C1)C2=COC3=C(C2=O)C=CC(=C3)O)O	Calycosin	-
Huangqi	Hedysarum Multijugum Maxim	HQ12	C1=CC(=CC=C1C(=O)NC(CCC(=O)O)C(=O)O)NCC2=CN=C3C(=N2)C(=O)N=C(N3)N	FA	-
Huangqi	Hedysarum Multijugum Maxim	HQ13	COC1=CC(=C2C(=C1)OCC3=C2OC4=CC(=CC(=C34)O)OC)O	1,7-Dihydroxy-3,9-dimethoxy pterocarpene	-
Huangqi	Hedysarum Multijugum Maxim	HQ14	CC(=O)OC1COC(C(C1OC(=O)C)OC(=O)C)OC2CCC34CC35CCC6(C(C(CC6(C5CC(C4C2(C)C)OC7C(C(C(C(O7)CO)O)O)O)C)O)C8(CCC(O8)C(C)(C)O)C)C	acetylastragaloside I	-
Huangqi	Hedysarum Multijugum Maxim	HQ15	COC1=C(C(=C(C=C1)C2CC3=C(C=C(C=C3)O)OC2)O)OC	(3R)-3-(2-hydroxy-3,4-dimethoxyphenyl)chroman-7-ol	-
Huangqi	Hedysarum Multijugum Maxim	HQ16	CCCCCC(C=CC=CCCCCCCCC(=O)O)O	13-hydroxy-9,11-octadecadienoic acid	-
Huangqi	Hedysarum Multijugum Maxim	HQ17	COC1=CC2=C(CC(CO2)C3=C(C(=C(C=C3)OC)OC)O)C=C1	7-O-methylisomucronulatol	-
Huangqi	Hedysarum Multijugum Maxim	HQ18	CC1(C(CCC23C1C(CC4C2(C3)CCC5(C4(CC(C5C6(CCC(O6)C(C)(C)O)C)O)C)C)OC7C(C(C(C(O7)CO)O)O)O)OC8C(C(C(CO8)O)O)O)C	astragalosideⅣ	-
Huangqi	Hedysarum Multijugum Maxim	HQ19	CC(=O)OC1C(COC(C1OC(=O)C)OC2CCC34CC35CCC6(C(C(CC6(C5CC(C4C2)OC7C(C(C(C(O7)CO)O)O)O)C)O)C8(CCC(O8)C(C)(C)O)C)C)O	astragalosideI	-
Huangqi	Hedysarum Multijugum Maxim	HQ20	-	astragalosideII	-
Huangqi	Hedysarum Multijugum Maxim	HQ21	CC1(C(CCC23C1C(CC4C2(C3)CCC5(C4(CC(C5C6(CCC(O6)C(C)(C)O)C)O)C)C)O)OC7C(C(C(CO7)O)O)OC8C(C(C(C(O8)CO)O)O)O)C	astragalosideⅢ	-
Huangqi	Hedysarum Multijugum Maxim	HQ22	C1=CC(=CC=C1C2=CSC(=N2)CCl)[N+](=O)[O-]	2-(Chloromethyl)-4-(4-Nitrophenyl)-1,3-Thiazole	-
Huangqi	Hedysarum Multijugum Maxim	A1	C1=CC(=C(C=C1C2=C(C(=O)C3=C(C=C(C=C3O2)O)O)O)O)O	quercetin	CH-HQ
Huangqi	Hedysarum Multijugum Maxim	A2	COC1=C(C=CC(=C1)C2=C(C(=O)C3=C(C=C(C=C3O2)O)O)O)O	isorhamnetin	CH-HQ
Huangqi	Hedysarum Multijugum Maxim	A3	C1=CC(=CC=C1C2=C(C(=O)C3=C(C=C(C=C3O2)O)O)O)O	kaempferol	CH-HQ
Danggui	Angelicae Sinensis Radix	DG1	CCC(CCC(C)C1CCC2C1(CCC3C2CC=C4C3(CCC(C4)O)C)C)C(C)C	beta-sitosterol	-
Danggui	Angelicae Sinensis Radix	DG2	CCCC=C1C2=C(C3C(CC2)C(C34C5=C(C=CCC5)C(=O)O4)CCC)C(=O)O1	6,7,3',8'-diligustilide	-
Danggui	Angelicae Sinensis Radix	DG3	CCCCC1C2=CC=CC=C2C(=O)O1	(3S)-3-butyl-3H-isobenzofuran-1-one	-
Danggui	Angelicae Sinensis Radix	DG4	COC1=C(C=CC(=C1)C=CC(=O)O)O	FERULIC ACID (CIS)	-
Danggui	Angelicae Sinensis Radix	DG5	COC1=C(C=CC(=C1)C=O)O	vanillin	-
Danggui	Angelicae Sinensis Radix	DG6	C1=CC=C(C=C1)C2=CC(=S)C=C(S2)C3=CC=CC=C3	2,6-di(phenyl)thiopyran-4-thione	-
Danggui	Angelicae Sinensis Radix	DG7	CCCCCCCCCCCCCCCC(=O)O	palmitic acid	-
Danggui	Angelicae Sinensis Radix	DG8	CC=CC1=CC(=C(C=C1)O)OC	isoeugenol	-
Danggui	Angelicae Sinensis Radix	DG9	CC(C)C1=CCC(=C)CC1	beta-Terpinene	-
Danggui	Angelicae Sinensis Radix	DG10	CC1C=CC(=O)O1	β-angelica lactone	-
Danggui	Angelicae Sinensis Radix	DG11	C1=CC2=C(C=CO2)C3=C1C=CC(=O)O3	Angelicin	-
Danggui	Angelicae Sinensis Radix	DG12	CCCC=C1C2=C(C=CCC2)C(=O)O1	cis-ligustilide	-
Danggui	Angelicae Sinensis Radix	DG13	CCCC=C1C2=C(C(=CC=C2)O)C(=O)O1	3-Butylidene-7-hydroxyphthalide	-
Danggui	Angelicae Sinensis Radix	DG14	CCCC(=O)C1(C2=C(C=CCC2)C(=O)O1)O	senkyunolide-D	-
Danggui	Angelicae Sinensis Radix	DG15	CCC(C=C1C2=CC=CC=C2C(=O)O1)O	senkyunolide-E	-
Danggui	Angelicae Sinensis Radix	DG16	CCC(=O)C(C)CC=C	4-Methyl-6-hepten-3-one	-
Danggui	Angelicae Sinensis Radix	DG17	CC1=CC(=C(C=C1)O)C(=O)C	o-Acetyl-p-cresol	-
Danggui	Angelicae Sinensis Radix	DG18	CC(=CCCC1(C2CCC(=C)C1C2)C)C	bergamotene	-
Danggui	Angelicae Sinensis Radix	DG19	CC(C)CCC1=CC=CC=C1	Isoamylbenzene	-
Danggui	Angelicae Sinensis Radix	DG20	C1=CC2=C(C=CN2)C=C1O	5-Indolol	-
Danggui	Angelicae Sinensis Radix	DG21	CC1=CCC2CC1C2(C)C	(-)-alpha-Pinene	-
Danggui	Angelicae Sinensis Radix	DG22	CC1=CCC(=O)O1	α-angelica lactone	-
Danggui	Angelicae Sinensis Radix	DG23	C=C1CCC(=O)O1	α'-angelica lactone	-
Danggui	Angelicae Sinensis Radix	B1	CCC(C=CC(C)C1CCC2C1(CCC3C2CC=C4C3(CCC(C4)O)C)C)C(C)C	Stigmasterol	CH-DG
Danggui	Angelicae Sinensis Radix	B2	C1=CC(=O)OC2=CC3=C(C=CO3)C=C21	Psoralen	CH-DG
Kudiding	Corydalis Bungeanae Herba	KDD1	C1C[N+]2=C(C=C3C=CC4=C(C3=C2)OCO4)C5=CC6=C(C=C51)OCO6	coptisine	-
Kudiding	Corydalis Bungeanae Herba	KDD2	C1CN2CC3=C(CC2C4=CC5=C(C=C41)OCO5)C=CC6=C3OCO6	stylopine	-
Kudiding	Corydalis Bungeanae Herba	KDD3	CN1C2=C(C=CC3=CC4=C(C=C32)OCO4)C5=C(C1=O)C6=C(C=C5)OCO6	Oxysanguinarine	-
Kudiding	Corydalis Bungeanae Herba	KDD4	CN1CCC2=CC3=C(C=C2C(=O)CC4=C(C1)C5=C(C=C4)OCO5)OCO3	Fumarine	-
Kudiding	Corydalis Bungeanae Herba	KDD5	CN1CCC2=CC3=C(C=C2C1C4C5=C(C6=C(C=C5)OCO6)C(=O)O4)OCO3	bicuculline	-
Kudiding	Corydalis Bungeanae Herba	KDD6	COC1=C(C=C2C3CC4=C(CN3CCC2=C1)C5=C(C=C4)OCO5)O	(S)-Cheilanthifoline	-
Kudiding	Corydalis Bungeanae Herba	KDD7	CC1C2=C(CN(CCC3=CC4=C(C=C3C1=O)OCO4)C)C5=C(C=C2)OCO5	corycavine	-
Kudiding	Corydalis Bungeanae Herba	KDD8	COC(=O)C1C(CCC2C1CC3C4=C(CCN3C2)C5=CC=CC=C5N4)O	coryincine	-
Kudiding	Corydalis Bungeanae Herba	KDD9	CN1CCC2=CC(=C(C3=C2C1CC4=C3C(=C(C=C4)OC)O)OC)OC	isocorynoline	-
Kudiding	Corydalis Bungeanae Herba	KDD10	C1OC2=C(O1)C3=CN=C4C(=C3C=C2)C=CC5=CC6=C(C=C54)OCO6	Norsanguinarine	-
Kudiding	Corydalis Bungeanae Herba	KDD11	CNCCC=C1C2=CC=CC=C2CCC3=CC=CC=C31.Cl	noryuziphine	-
Kudiding	Corydalis Bungeanae Herba	KDD12	CN1CCC2=C(C1CC3=CC=C(C=C3)O)C(=C(C=C2)OC)O	yuziphine	-
Kudiding	Corydalis Bungeanae Herba	KDD13	CC(=O)OC1CC2=CC3=C(C=C2C4C1(C5=C(CN4C)C6=C(C=C5)OCO6)C)OCO3	acetylcorynoline	-
Kudiding	Corydalis Bungeanae Herba	KDD14	COC1=C(C2=C(CC3C4=CC(=C(C=C4CCN3C2)OC)OC)C=C1)OC	tetrahydropalmatine	-
Kudiding	Corydalis Bungeanae Herba	KDD15	CC12C(CC3=CC4=C(C=C3C1N(C(=O)C5=C2C=CC6=C5OCO6)C)OCO4)O	8-oxocorynoline	-
Kudiding	Corydalis Bungeanae Herba	KDD16	CN1CC2=C(C=CC3=C2OCO3)C4=C1C5=CC6=C(C=C5C=C4)OCO6	Dihydrosanguinarine	-
Kudiding	Corydalis Bungeanae Herba	KDD17	CC12C(CC3=CC4=C(C=C3C1N(CC5=C2C=CC6=C5OCO6)C)OCO4)O	corynoline	-
