# Supplementary material for: The molecular mechanism of TiaoGanYiPi formula for treatment of chronic hepatitis B by network pharmacology and molecular docking verification
Source: Research Square preprint supplement (doi:10.21203/rs.3.rs-120141/v1), 2020-12-15

**The molecular mechanism of** **TiaoGanYiPi** **formula for treatment of chronic hepatitis B by** **network pharmacology and** **molecular docking verification**

Xu Cao1, 3*, Xiaobin Zao1, 2*, Baiquan Xue4, Hening Chen1, 3, Jiaxin Zhang1, 3,

Shuo Li1, 3, Xiaobin Li1, 3, Shun Zhu1, 3, Rui Guo3, Xiaoke Li1, 2# & Yongan Ye1, 2#

1Dongzhimen Hospital, Beijing University of Chinese Medicine, Beijing 100700, China;

2 Institute of Liver Diseases, Beijing University of Chinese Medicine, Beijing 100700, China;

3 Beijing University of Chinese Medicine, Beijing 100102, China;

4 The First People's Hospital of Jinzhou District

*These authors contributed equally: Xu Cao and Xiaobin Zao

#Correspondence should be addressed to Yong’an Ye and Xiaoke Li

**Figure S1.** **Compound-Putative Targets Network.** (A) The Venn diagram for active compounds of four herbs in TGYP. Blue oval represents Chaihu, teal oval represents Kudiding, green oval represents Danggui, red oval represents Huangqi; (B) The Venn diagram for compound-putative target genes. Red circle represents STITCH, Blue circle represents SwissTargetPrediction; (C) The visualized compound-putative target network of TGYP. White diamonds represent herb in TGYP, teal rectangle represent compound target genes, green circles represent the components in Chaihu, red circles represent the components in Huangqi, blue circles represent the components in Kudiding, yellow circles represent the components in Danggui, A1 represents the components Quercetin, A2 represents the components Isorhamnetin, A3 represents the components Kaempferol, B1 circle represents the components stigmasterol, B2 circle represents the components psoralen.


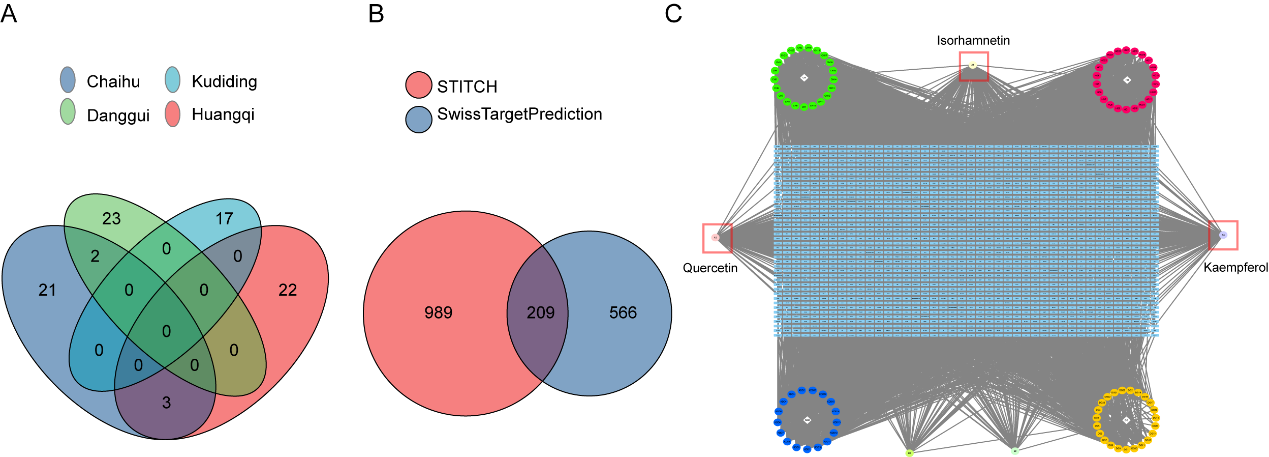


**Figure S2. OGEs: Intersecting Compound-Putative Targets and Disease targets in CHB.** (A) The Venn diagram for CHB related targets. Blue circle represents GeneCards, red circle represents DisGeNET, green circle represents NCBI Gene; (B) Venn diagram for OGEs of TGYP and CHB targets. Red circle represents compound target genes, blue circle represents disease target genes, purple circle represents OGEs; (C) PPI network of OGEs.


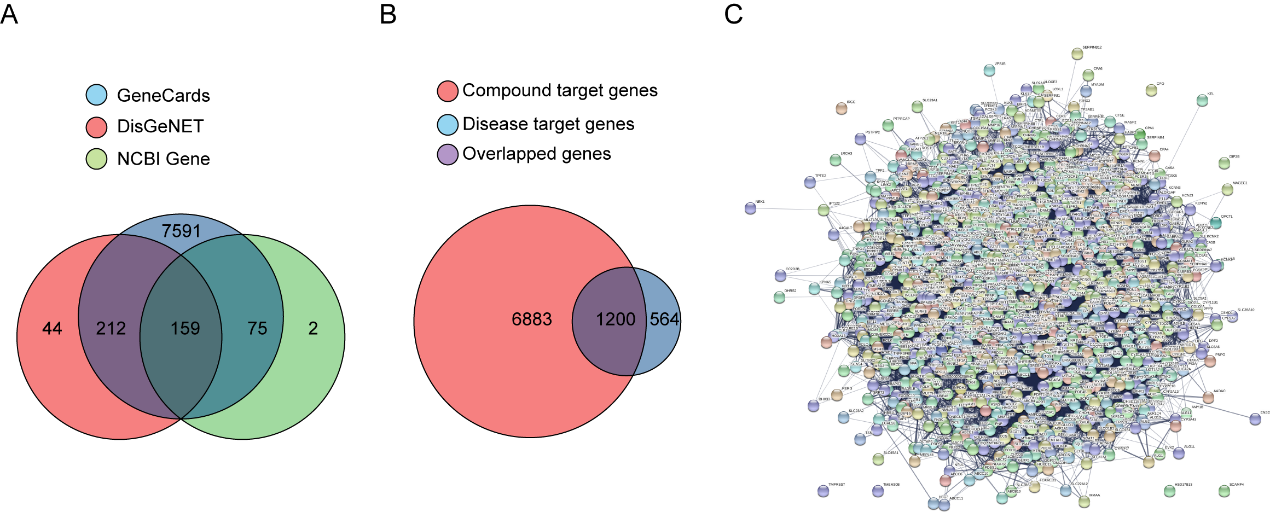

Supplement: Supplementary file 1 [file 72a98637c8c5cfa02ecce806.docx]
