# Supplementary material for: The molecular mechanism of TiaoGanYiPi formula for treatment of chronic hepatitis B by network pharmacology and molecular docking verification
Source: Research Square preprint supplement (doi:10.21203/rs.3.rs-120141/v1), 2020-12-15
Supplement: Supplementary file 2 [file 47185a5485f193ec79bb1bc8.xlsx]

## Sheet: Table 2S
Herb	Molecule name	Common name	Probability/Combined score	Database
CH1	Linoleyl acetate	CNR1	0.111502	SwissTargetPrediction
CH1	Linoleyl acetate	HSD11B1	0.111502	SwissTargetPrediction
CH1	Linoleyl acetate	FAAH	0.111502	SwissTargetPrediction
CH1	Linoleyl acetate	CYP19A1	0.111502	SwissTargetPrediction
CH1	Linoleyl acetate	CYP17A1	0.111502	SwissTargetPrediction
CH1	Linoleyl acetate	AR	0.111502	SwissTargetPrediction
CH1	Linoleyl acetate	CNR2	0.111502	SwissTargetPrediction
CH1	Linoleyl acetate	MCL1	0.111502	SwissTargetPrediction
CH1	Linoleyl acetate	BCL2	0.111502	SwissTargetPrediction
CH1	Linoleyl acetate	HSD11B2	0.111502	SwissTargetPrediction
CH1	Linoleyl acetate	PTPN1	0.111502	SwissTargetPrediction
CH1	Linoleyl acetate	PTGES	0.111502	SwissTargetPrediction
CH1	Linoleyl acetate	TAS2R31	0.111502	SwissTargetPrediction
CH1	Linoleyl acetate	F2R	0.111502	SwissTargetPrediction
CH1	Linoleyl acetate	ALOX5AP	0.111502	SwissTargetPrediction
CH1	Linoleyl acetate	GRIN1	0.111502	SwissTargetPrediction
CH1	Linoleyl acetate	GRIN2B	0.111502	SwissTargetPrediction
CH1	Linoleyl acetate	TNKS	0.111502	SwissTargetPrediction
CH1	Linoleyl acetate	EPHB4	0.111502	SwissTargetPrediction
CH1	Linoleyl acetate	AURKB	0.111502	SwissTargetPrediction
CH1	Linoleyl acetate	JAK2	0.111502	SwissTargetPrediction
CH1	Linoleyl acetate	ROCK2	0.111502	SwissTargetPrediction
CH1	Linoleyl acetate	ROCK1	0.111502	SwissTargetPrediction
CH1	Linoleyl acetate	CA14	0.111502	SwissTargetPrediction
CH1	Linoleyl acetate	CXCR3	0.111502	SwissTargetPrediction
CH1	Linoleyl acetate	SCN9A	0.111502	SwissTargetPrediction
CH1	Linoleyl acetate	QPCT	0.111502	SwissTargetPrediction
CH1	Linoleyl acetate	HRH2	0.111502	SwissTargetPrediction
CH1	Linoleyl acetate	PGR	0.111502	SwissTargetPrediction
CH1	Linoleyl acetate	HRH3	0.111502	SwissTargetPrediction
CH1	Linoleyl acetate	HRH4	0.111502	SwissTargetPrediction
CH1	Linoleyl acetate	NR3C2	0.111502	SwissTargetPrediction
CH1	Linoleyl acetate	HMGCR	0.111502	SwissTargetPrediction
CH1	Linoleyl acetate	HPGD	0.111502	SwissTargetPrediction
CH1	Linoleyl acetate	NPY5R	0.111502	SwissTargetPrediction
CH1	Linoleyl acetate	DGAT1	0.111502	SwissTargetPrediction
CH1	Linoleyl acetate	NR3C1	0.111502	SwissTargetPrediction
CH1	Linoleyl acetate	PORCN	0.111502	SwissTargetPrediction
CH1	Linoleyl acetate	CRHR1	0.111502	SwissTargetPrediction
CH1	Linoleyl acetate	C5AR1	0.111502	SwissTargetPrediction
CH1	Linoleyl acetate	RBP4	0.111502	SwissTargetPrediction
CH1	Linoleyl acetate	MGLL	0.111502	SwissTargetPrediction
CH1	Linoleyl acetate	ABL1	0.111502	SwissTargetPrediction
CH1	Linoleyl acetate	GCGR	0.111502	SwissTargetPrediction
CH1	Linoleyl acetate	YES1	0.111502	SwissTargetPrediction
CH1	Linoleyl acetate	ABHD6	0.111502	SwissTargetPrediction
CH1	Linoleyl acetate	LCK	0.111502	SwissTargetPrediction
CH1	Linoleyl acetate	MAPK14	0.111502	SwissTargetPrediction
CH1	Linoleyl acetate	SRC	0.111502	SwissTargetPrediction
CH1	Linoleyl acetate	PARP2	0.111502	SwissTargetPrediction
CH1	Linoleyl acetate	SOAT1	0.111502	SwissTargetPrediction
CH1	Linoleyl acetate	HSD17B2	0.111502	SwissTargetPrediction
CH1	Linoleyl acetate	RARA	0.111502	SwissTargetPrediction
CH1	Linoleyl acetate	CYP11B1	0.111502	SwissTargetPrediction
CH1	Linoleyl acetate	CYP11B2	0.111502	SwissTargetPrediction
CH1	Linoleyl acetate	AKR1C1	0.111502	SwissTargetPrediction
CH1	Linoleyl acetate	CTSK	0.111502	SwissTargetPrediction
CH1	Linoleyl acetate	CTSS	0.111502	SwissTargetPrediction
CH1	Linoleyl acetate	FABP4	0.111502	SwissTargetPrediction
CH1	Linoleyl acetate	FABP3	0.111502	SwissTargetPrediction
CH1	Linoleyl acetate	PPARD	0.111502	SwissTargetPrediction
CH1	Linoleyl acetate	GCK	0.111502	SwissTargetPrediction
CH1	Linoleyl acetate	GPR119	0.111502	SwissTargetPrediction
CH1	Linoleyl acetate	BRD4	0.111502	SwissTargetPrediction
CH1	Linoleyl acetate	BRD2	0.111502	SwissTargetPrediction
CH1	Linoleyl acetate	BRD3	0.111502	SwissTargetPrediction
CH1	Linoleyl acetate	NOD1	0.111502	SwissTargetPrediction
CH1	Linoleyl acetate	NOD2	0.111502	SwissTargetPrediction
CH1	Linoleyl acetate	OPRD1	0.111502	SwissTargetPrediction
CH1	Linoleyl acetate	PTAFR	0.111502	SwissTargetPrediction
CH1	Linoleyl acetate	NAMPT	0.111502	SwissTargetPrediction
CH1	Linoleyl acetate	IDH1	0.111502	SwissTargetPrediction
CH1	Linoleyl acetate	DHFR	0.111502	SwissTargetPrediction
CH1	Linoleyl acetate	PIM1	0.111502	SwissTargetPrediction
CH1	Linoleyl acetate	TSPO	0.111502	SwissTargetPrediction
CH1	Linoleyl acetate	GABRA5	0.111502	SwissTargetPrediction
CH1	Linoleyl acetate	GABRA1	0.111502	SwissTargetPrediction
CH2	Baicalin	AKR1B1	0.131435	SwissTargetPrediction
CH2	Baicalin	ADORA1	0.123138	SwissTargetPrediction
CH2	Baicalin	TNF	0.114839	SwissTargetPrediction
CH2	Baicalin	IL2	0.114839	SwissTargetPrediction
CH2	Baicalin	XDH	0.106543	SwissTargetPrediction
CH2	Baicalin	PTGS2	0.106543	SwissTargetPrediction
CH2	Baicalin	RPS6KA3	0.106543	SwissTargetPrediction
CH2	Baicalin	EGFR	0.106543	SwissTargetPrediction
CH2	Baicalin	ACHE	0.106543	SwissTargetPrediction
CH2	Baicalin	NQO2	0.106543	SwissTargetPrediction
CH2	Baicalin	NMUR2	0.106543	SwissTargetPrediction
CH2	Baicalin	ADRA2A	0.106543	SwissTargetPrediction
CH2	Baicalin	ADRA2C	0.106543	SwissTargetPrediction
CH2	Baicalin	NOX4	0.106543	SwissTargetPrediction
CH2	Baicalin	ALDH2	0.106543	SwissTargetPrediction
CH2	Baicalin	FDFT1	0.106543	SwissTargetPrediction
CH2	Baicalin	CA2	0.106543	SwissTargetPrediction
CH2	Baicalin	CA12	0.106543	SwissTargetPrediction
CH3	3,5,6,7-tetramethoxy-2-(3,4,5-trimethoxyphenyl)chromone	ABCG2	0.416538	SwissTargetPrediction
CH3	3,5,6,7-tetramethoxy-2-(3,4,5-trimethoxyphenyl)chromone	PLG	0.207349	SwissTargetPrediction
CH3	3,5,6,7-tetramethoxy-2-(3,4,5-trimethoxyphenyl)chromone	ADORA3	0.19929	SwissTargetPrediction
CH3	3,5,6,7-tetramethoxy-2-(3,4,5-trimethoxyphenyl)chromone	ADORA2A	0.159097	SwissTargetPrediction
CH3	3,5,6,7-tetramethoxy-2-(3,4,5-trimethoxyphenyl)chromone	CA7	0.151058	SwissTargetPrediction
CH3	3,5,6,7-tetramethoxy-2-(3,4,5-trimethoxyphenyl)chromone	PLK1	0.151058	SwissTargetPrediction
CH3	3,5,6,7-tetramethoxy-2-(3,4,5-trimethoxyphenyl)chromone	ABCB1	0.134972	SwissTargetPrediction
CH3	3,5,6,7-tetramethoxy-2-(3,4,5-trimethoxyphenyl)chromone	FLT3	0.126929	SwissTargetPrediction
CH3	3,5,6,7-tetramethoxy-2-(3,4,5-trimethoxyphenyl)chromone	SYK	0.126929	SwissTargetPrediction
CH3	3,5,6,7-tetramethoxy-2-(3,4,5-trimethoxyphenyl)chromone	KDR	0.126929	SwissTargetPrediction
CH3	3,5,6,7-tetramethoxy-2-(3,4,5-trimethoxyphenyl)chromone	CYP1B1	0.126929	SwissTargetPrediction
CH3	3,5,6,7-tetramethoxy-2-(3,4,5-trimethoxyphenyl)chromone	MET	0.126929	SwissTargetPrediction
CH3	3,5,6,7-tetramethoxy-2-(3,4,5-trimethoxyphenyl)chromone	ALOX5	0.126929	SwissTargetPrediction
CH3	3,5,6,7-tetramethoxy-2-(3,4,5-trimethoxyphenyl)chromone	GSK3B	0.126929	SwissTargetPrediction
CH3	3,5,6,7-tetramethoxy-2-(3,4,5-trimethoxyphenyl)chromone	CA1	0.118883	SwissTargetPrediction
CH3	3,5,6,7-tetramethoxy-2-(3,4,5-trimethoxyphenyl)chromone	CA13	0.118883	SwissTargetPrediction
CH3	3,5,6,7-tetramethoxy-2-(3,4,5-trimethoxyphenyl)chromone	APP	0.118883	SwissTargetPrediction
CH3	3,5,6,7-tetramethoxy-2-(3,4,5-trimethoxyphenyl)chromone	AXL	0.118883	SwissTargetPrediction
CH3	3,5,6,7-tetramethoxy-2-(3,4,5-trimethoxyphenyl)chromone	BACE1	0.118883	SwissTargetPrediction
CH3	3,5,6,7-tetramethoxy-2-(3,4,5-trimethoxyphenyl)chromone	KIT	0.118883	SwissTargetPrediction
CH3	3,5,6,7-tetramethoxy-2-(3,4,5-trimethoxyphenyl)chromone	CDK1	0.118883	SwissTargetPrediction
CH3	3,5,6,7-tetramethoxy-2-(3,4,5-trimethoxyphenyl)chromone	CAMK2B	0.118883	SwissTargetPrediction
CH3	3,5,6,7-tetramethoxy-2-(3,4,5-trimethoxyphenyl)chromone	PTK2	0.118883	SwissTargetPrediction
CH3	3,5,6,7-tetramethoxy-2-(3,4,5-trimethoxyphenyl)chromone	PIK3CG	0.118883	SwissTargetPrediction
CH3	3,5,6,7-tetramethoxy-2-(3,4,5-trimethoxyphenyl)chromone	IGF1R	0.118883	SwissTargetPrediction
CH3	3,5,6,7-tetramethoxy-2-(3,4,5-trimethoxyphenyl)chromone	INSR	0.118883	SwissTargetPrediction
CH3	3,5,6,7-tetramethoxy-2-(3,4,5-trimethoxyphenyl)chromone	MYLK	0.118883	SwissTargetPrediction
CH3	3,5,6,7-tetramethoxy-2-(3,4,5-trimethoxyphenyl)chromone	DAPK1	0.118883	SwissTargetPrediction
CH3	3,5,6,7-tetramethoxy-2-(3,4,5-trimethoxyphenyl)chromone	PKN1	0.118883	SwissTargetPrediction
CH3	3,5,6,7-tetramethoxy-2-(3,4,5-trimethoxyphenyl)chromone	CSNK2A1	0.118883	SwissTargetPrediction
CH3	3,5,6,7-tetramethoxy-2-(3,4,5-trimethoxyphenyl)chromone	NEK2	0.118883	SwissTargetPrediction
CH3	3,5,6,7-tetramethoxy-2-(3,4,5-trimethoxyphenyl)chromone	ALK	0.118883	SwissTargetPrediction
CH3	3,5,6,7-tetramethoxy-2-(3,4,5-trimethoxyphenyl)chromone	NEK6	0.118883	SwissTargetPrediction
CH3	3,5,6,7-tetramethoxy-2-(3,4,5-trimethoxyphenyl)chromone	NUAK1	0.118883	SwissTargetPrediction
CH3	3,5,6,7-tetramethoxy-2-(3,4,5-trimethoxyphenyl)chromone	CDK5R1	0.118883	SwissTargetPrediction
CH3	3,5,6,7-tetramethoxy-2-(3,4,5-trimethoxyphenyl)chromone	CDK5	0.118883	SwissTargetPrediction
CH3	3,5,6,7-tetramethoxy-2-(3,4,5-trimethoxyphenyl)chromone	F2	0.118883	SwissTargetPrediction
CH3	3,5,6,7-tetramethoxy-2-(3,4,5-trimethoxyphenyl)chromone	CA6	0.118883	SwissTargetPrediction
CH3	3,5,6,7-tetramethoxy-2-(3,4,5-trimethoxyphenyl)chromone	OPRM1	0.118883	SwissTargetPrediction
CH3	3,5,6,7-tetramethoxy-2-(3,4,5-trimethoxyphenyl)chromone	KDM4E	0.118883	SwissTargetPrediction
CH3	3,5,6,7-tetramethoxy-2-(3,4,5-trimethoxyphenyl)chromone	TOP2A	0.118883	SwissTargetPrediction
CH3	3,5,6,7-tetramethoxy-2-(3,4,5-trimethoxyphenyl)chromone	PIK3R1	0.118883	SwissTargetPrediction
CH3	3,5,6,7-tetramethoxy-2-(3,4,5-trimethoxyphenyl)chromone	PYGL	0.118883	SwissTargetPrediction
CH3	3,5,6,7-tetramethoxy-2-(3,4,5-trimethoxyphenyl)chromone	MMP13	0.118883	SwissTargetPrediction
CH3	3,5,6,7-tetramethoxy-2-(3,4,5-trimethoxyphenyl)chromone	CA3	0.118883	SwissTargetPrediction
CH3	3,5,6,7-tetramethoxy-2-(3,4,5-trimethoxyphenyl)chromone	PLA2G1B	0.118883	SwissTargetPrediction
CH3	3,5,6,7-tetramethoxy-2-(3,4,5-trimethoxyphenyl)chromone	CA5A	0.118883	SwissTargetPrediction
CH3	3,5,6,7-tetramethoxy-2-(3,4,5-trimethoxyphenyl)chromone	APEX1	0.118883	SwissTargetPrediction
CH3	3,5,6,7-tetramethoxy-2-(3,4,5-trimethoxyphenyl)chromone	AKR1C2	0.118883	SwissTargetPrediction
CH3	3,5,6,7-tetramethoxy-2-(3,4,5-trimethoxyphenyl)chromone	AKR1C4	0.118883	SwissTargetPrediction
CH3	3,5,6,7-tetramethoxy-2-(3,4,5-trimethoxyphenyl)chromone	AKR1A1	0.118883	SwissTargetPrediction
CH3	3,5,6,7-tetramethoxy-2-(3,4,5-trimethoxyphenyl)chromone	MMP2	0.118883	SwissTargetPrediction
CH3	3,5,6,7-tetramethoxy-2-(3,4,5-trimethoxyphenyl)chromone	DRD4	0.118883	SwissTargetPrediction
CH3	3,5,6,7-tetramethoxy-2-(3,4,5-trimethoxyphenyl)chromone	MAOA	0.118883	SwissTargetPrediction
CH3	3,5,6,7-tetramethoxy-2-(3,4,5-trimethoxyphenyl)chromone	MMP3	0.118883	SwissTargetPrediction
CH3	3,5,6,7-tetramethoxy-2-(3,4,5-trimethoxyphenyl)chromone	MMP9	0.118883	SwissTargetPrediction
CH3	3,5,6,7-tetramethoxy-2-(3,4,5-trimethoxyphenyl)chromone	CDK2	0.118883	SwissTargetPrediction
CH3	3,5,6,7-tetramethoxy-2-(3,4,5-trimethoxyphenyl)chromone	CA4	0.118883	SwissTargetPrediction
CH3	3,5,6,7-tetramethoxy-2-(3,4,5-trimethoxyphenyl)chromone	NOS2	0.118883	SwissTargetPrediction
CH3	3,5,6,7-tetramethoxy-2-(3,4,5-trimethoxyphenyl)chromone	AVPR2	0.118883	SwissTargetPrediction
CH3	3,5,6,7-tetramethoxy-2-(3,4,5-trimethoxyphenyl)chromone	CA9	0.118883	SwissTargetPrediction
CH3	3,5,6,7-tetramethoxy-2-(3,4,5-trimethoxyphenyl)chromone	CDK6	0.118883	SwissTargetPrediction
CH3	3,5,6,7-tetramethoxy-2-(3,4,5-trimethoxyphenyl)chromone	ARG1	0.118883	SwissTargetPrediction
CH3	3,5,6,7-tetramethoxy-2-(3,4,5-trimethoxyphenyl)chromone	AKT1	0.118883	SwissTargetPrediction
CH3	3,5,6,7-tetramethoxy-2-(3,4,5-trimethoxyphenyl)chromone	CCNB3	0.118883	SwissTargetPrediction
CH3	3,5,6,7-tetramethoxy-2-(3,4,5-trimethoxyphenyl)chromone	CCNB1	0.118883	SwissTargetPrediction
CH3	3,5,6,7-tetramethoxy-2-(3,4,5-trimethoxyphenyl)chromone	CCNB2	0.118883	SwissTargetPrediction
CH3	3,5,6,7-tetramethoxy-2-(3,4,5-trimethoxyphenyl)chromone	ALOX12	0.118883	SwissTargetPrediction
CH3	3,5,6,7-tetramethoxy-2-(3,4,5-trimethoxyphenyl)chromone	TYR	0.118883	SwissTargetPrediction
CH3	3,5,6,7-tetramethoxy-2-(3,4,5-trimethoxyphenyl)chromone	AHR	0.118883	SwissTargetPrediction
CH3	3,5,6,7-tetramethoxy-2-(3,4,5-trimethoxyphenyl)chromone	ALOX15	0.118883	SwissTargetPrediction
CH3	3,5,6,7-tetramethoxy-2-(3,4,5-trimethoxyphenyl)chromone	ESR2	0.118883	SwissTargetPrediction
CH3	3,5,6,7-tetramethoxy-2-(3,4,5-trimethoxyphenyl)chromone	ESRRA	0.118883	SwissTargetPrediction
CH3	3,5,6,7-tetramethoxy-2-(3,4,5-trimethoxyphenyl)chromone	AKR1C3	0.118883	SwissTargetPrediction
CH3	3,5,6,7-tetramethoxy-2-(3,4,5-trimethoxyphenyl)chromone	PARP1	0.118883	SwissTargetPrediction
CH3	3,5,6,7-tetramethoxy-2-(3,4,5-trimethoxyphenyl)chromone	ST6GAL1	0.118883	SwissTargetPrediction
CH3	3,5,6,7-tetramethoxy-2-(3,4,5-trimethoxyphenyl)chromone	ABCC1	0.118883	SwissTargetPrediction
CH3	3,5,6,7-tetramethoxy-2-(3,4,5-trimethoxyphenyl)chromone	MAPT	0.118883	SwissTargetPrediction
CH3	3,5,6,7-tetramethoxy-2-(3,4,5-trimethoxyphenyl)chromone	PTPRS	0.118883	SwissTargetPrediction
CH3	3,5,6,7-tetramethoxy-2-(3,4,5-trimethoxyphenyl)chromone	MPG	0.118883	SwissTargetPrediction
CH3	3,5,6,7-tetramethoxy-2-(3,4,5-trimethoxyphenyl)chromone	PDE5A	0.118883	SwissTargetPrediction
CH3	3,5,6,7-tetramethoxy-2-(3,4,5-trimethoxyphenyl)chromone	GPR35	0.118883	SwissTargetPrediction
CH3	3,5,6,7-tetramethoxy-2-(3,4,5-trimethoxyphenyl)chromone	MPO	0.118883	SwissTargetPrediction
CH3	3,5,6,7-tetramethoxy-2-(3,4,5-trimethoxyphenyl)chromone	TERT	0.118883	SwissTargetPrediction
CH4	Areapillin	ODC1	0.117455	SwissTargetPrediction
CH4	Areapillin	PLA2G2A	0.10934	SwissTargetPrediction
CH4	Areapillin	GLO1	0.10934	SwissTargetPrediction
CH4	Areapillin	TTR	0.10934	SwissTargetPrediction
CH4	Areapillin	CD38	0.10934	SwissTargetPrediction
CH4	Areapillin	TNKS2	0.10934	SwissTargetPrediction
CH4	Areapillin	SLC22A12	0.10934	SwissTargetPrediction
CH4	Areapillin	AMY1A	0.10934	SwissTargetPrediction
CH4	Areapillin	GRK6	0.10934	SwissTargetPrediction
CH4	Areapillin	CFTR	0.10934	SwissTargetPrediction
CH4	Areapillin	NAE1	0.10934	SwissTargetPrediction
CH5	Cubebin	SLC6A3	0.10934	SwissTargetPrediction
CH5	Cubebin	SLC6A2	0.10934	SwissTargetPrediction
CH5	Cubebin	SHBG	0.10934	SwissTargetPrediction
CH5	Cubebin	MAPK9	0.10934	SwissTargetPrediction
CH5	Cubebin	EWS-Fli1	0.10934	SwissTargetPrediction
CH5	Cubebin	PDE10A	0.10934	SwissTargetPrediction
CH5	Cubebin	TDP2	0.10934	SwissTargetPrediction
CH5	Cubebin	MAP2K1	0.10934	SwissTargetPrediction
CH5	Cubebin	IMPDH2	0.10934	SwissTargetPrediction
CH5	Cubebin	FBP1	0.10934	SwissTargetPrediction
CH5	Cubebin	LYPLA1	0.10934	SwissTargetPrediction
CH5	Cubebin	LYPLA2	0.10934	SwissTargetPrediction
CH5	Cubebin	CA5B	0.10934	SwissTargetPrediction
CH5	Cubebin	CCNE2	0.10934	SwissTargetPrediction
CH5	Cubebin	CCNE1	0.10934	SwissTargetPrediction
CH5	Cubebin	ACPP	0.10934	SwissTargetPrediction
CH5	Cubebin	PNP	0.10934	SwissTargetPrediction
CH5	Cubebin	ABCC9	0.10934	SwissTargetPrediction
CH5	Cubebin	CASP8	0.10934	SwissTargetPrediction
CH5	Cubebin	CASP1	0.10934	SwissTargetPrediction
CH5	Cubebin	MTOR	0.10934	SwissTargetPrediction
CH5	Cubebin	MMP1	0.10934	SwissTargetPrediction
CH5	Cubebin	MMP8	0.10934	SwissTargetPrediction
CH5	Cubebin	AURKA	0.10934	SwissTargetPrediction
CH5	Cubebin	PKM	0.10934	SwissTargetPrediction
CH5	Cubebin	JAK1	0.10934	SwissTargetPrediction
CH5	Cubebin	BRS3	0.10934	SwissTargetPrediction
CH5	Cubebin	EIF2AK3	0.10934	SwissTargetPrediction
CH5	Cubebin	JAK3	0.10934	SwissTargetPrediction
CH5	Cubebin	TYK2	0.10934	SwissTargetPrediction
CH5	Cubebin	ADAM17	0.10934	SwissTargetPrediction
CH5	Cubebin	MMP14	0.10934	SwissTargetPrediction
CH5	Cubebin	MMP7	0.10934	SwissTargetPrediction
CH5	Cubebin	PLEC	0.10934	SwissTargetPrediction
CH5	Cubebin	TRPM8	0.10934	SwissTargetPrediction
CH5	Cubebin	NTRK1	0.10934	SwissTargetPrediction
CH5	Cubebin	CREBBP	0.10934	SwissTargetPrediction
CH5	Cubebin	AOC3	0.10934	SwissTargetPrediction
CH5	Cubebin	XIAP	0.10934	SwissTargetPrediction
CH5	Cubebin	BDKRB1	0.10934	SwissTargetPrediction
CH5	Cubebin	PIK3CD	0.10934	SwissTargetPrediction
CH5	Cubebin	PRKDC	0.10934	SwissTargetPrediction
CH5	Cubebin	PIK3CB	0.10934	SwissTargetPrediction
CH5	Cubebin	GRK2	0.10934	SwissTargetPrediction
CH5	Cubebin	TNK2	0.10934	SwissTargetPrediction
CH5	Cubebin	SLC6A4	0.10934	SwissTargetPrediction
CH5	Cubebin	PLA2G7	0.10934	SwissTargetPrediction
CH5	Cubebin	MAP3K5	0.10934	SwissTargetPrediction
CH5	Cubebin	CAPN1	0.10934	SwissTargetPrediction
CH5	Cubebin	CMA1	0.10934	SwissTargetPrediction
CH5	Cubebin	CDC7	0.10934	SwissTargetPrediction
CH5	Cubebin	PTGER3	0.10934	SwissTargetPrediction
CH5	Cubebin	HSP90AA1	0.10934	SwissTargetPrediction
CH6	Sainfuran	ESR1	0.328396	SwissTargetPrediction
CH8	α-spinasterol	CHRM2	0.306044	SwissTargetPrediction
CH8	α-spinasterol	CYP2C19	0.306044	SwissTargetPrediction
CH8	α-spinasterol	CYP51A1	0.17281	SwissTargetPrediction
CH8	α-spinasterol	SREBF2	0.164472	SwissTargetPrediction
CH8	α-spinasterol	NPC1L1	0.156149	SwissTargetPrediction
CH8	α-spinasterol	BCHE	0.147815	SwissTargetPrediction
CH8	α-spinasterol	RORC	0.131156	SwissTargetPrediction
CH8	α-spinasterol	NR1I3	0.122827	SwissTargetPrediction
CH8	α-spinasterol	NR1H3	0.122827	SwissTargetPrediction
CH8	α-spinasterol	SQLE	0.106166	SwissTargetPrediction
CH8	α-spinasterol	SERPINA6	0.106166	SwissTargetPrediction
CH8	α-spinasterol	CDC25A	0.106166	SwissTargetPrediction
CH8	α-spinasterol	CES2	0.106166	SwissTargetPrediction
CH8	α-spinasterol	PTPN6	0.106166	SwissTargetPrediction
CH8	α-spinasterol	PREP	0.106166	SwissTargetPrediction
CH8	α-spinasterol	VDR	0.106166	SwissTargetPrediction
CH8	α-spinasterol	POLB	0.106166	SwissTargetPrediction
CH8	α-spinasterol	GLRA1	0.106166	SwissTargetPrediction
CH8	α-spinasterol	ATP12A	0.106166	SwissTargetPrediction
CH8	α-spinasterol	FNTA	0.106166	SwissTargetPrediction
CH8	α-spinasterol	FNTB	0.106166	SwissTargetPrediction
CH8	α-spinasterol	CDC25B	0.106166	SwissTargetPrediction
CH8	α-spinasterol	PPARG	0.106166	SwissTargetPrediction
CH8	α-spinasterol	PPARA	0.106166	SwissTargetPrediction
CH8	α-spinasterol	FABP5	0.106166	SwissTargetPrediction
CH8	α-spinasterol	FABP1	0.106166	SwissTargetPrediction
CH8	α-spinasterol	RORA	0.106166	SwissTargetPrediction
CH8	α-spinasterol	MAPK3	0.106166	SwissTargetPrediction
CH8	α-spinasterol	PTPN11	0.106166	SwissTargetPrediction
CH8	α-spinasterol	AKR1B10	0.106166	SwissTargetPrediction
CH8	α-spinasterol	DHCR7	0.106166	SwissTargetPrediction
CH8	α-spinasterol	PDE4D	0.106166	SwissTargetPrediction
CH8	α-spinasterol	PTPRF	0.106166	SwissTargetPrediction
CH8	α-spinasterol	UGT2B7	0.106166	SwissTargetPrediction
CH8	α-spinasterol	ACP1	0.106166	SwissTargetPrediction
CH8	α-spinasterol	SCD	0.106166	SwissTargetPrediction
CH8	α-spinasterol	G6PD	0.106166	SwissTargetPrediction
CH8	α-spinasterol	PTPN2	0.106166	SwissTargetPrediction
CH10	(+)-Anomalin	ELANE	0.118883	SwissTargetPrediction
CH10	(+)-Anomalin	CSF1R	0.118883	SwissTargetPrediction
CH10	(+)-Anomalin	CTSV	0.118883	SwissTargetPrediction
CH10	(+)-Anomalin	CTSL	0.118883	SwissTargetPrediction
CH10	(+)-Anomalin	KCNJ6	0.118883	SwissTargetPrediction
CH10	(+)-Anomalin	KCNJ3	0.118883	SwissTargetPrediction
CH10	(+)-Anomalin	HCRTR2	0.118883	SwissTargetPrediction
CH10	(+)-Anomalin	KCNJ5	0.118883	SwissTargetPrediction
CH10	(+)-Anomalin	GRM5	0.118883	SwissTargetPrediction
CH10	(+)-Anomalin	HCRTR1	0.118883	SwissTargetPrediction
CH10	(+)-Anomalin	KCNK3	0.118883	SwissTargetPrediction
CH10	(+)-Anomalin	KCNK9	0.118883	SwissTargetPrediction
CH10	(+)-Anomalin	P2RX3	0.118883	SwissTargetPrediction
CH10	(+)-Anomalin	SCN2A	0.118883	SwissTargetPrediction
CH10	(+)-Anomalin	SCN10A	0.118883	SwissTargetPrediction
CH10	(+)-Anomalin	CCND1	0.118883	SwissTargetPrediction
CH10	(+)-Anomalin	CDK4	0.118883	SwissTargetPrediction
CH10	(+)-Anomalin	PPIA	0.118883	SwissTargetPrediction
CH10	(+)-Anomalin	PDE4B	0.118883	SwissTargetPrediction
CH10	(+)-Anomalin	ELOVL6	0.118883	SwissTargetPrediction
CH10	(+)-Anomalin	P2RX7	0.118883	SwissTargetPrediction
CH10	(+)-Anomalin	SAE1	0.118883	SwissTargetPrediction
CH10	(+)-Anomalin	UBA2	0.118883	SwissTargetPrediction
CH10	(+)-Anomalin	CHRM1	0.118883	SwissTargetPrediction
CH10	(+)-Anomalin	F10	0.118883	SwissTargetPrediction
CH10	(+)-Anomalin	VCP	0.118883	SwissTargetPrediction
CH10	(+)-Anomalin	CXCR2	0.118883	SwissTargetPrediction
CH10	(+)-Anomalin	CHRM3	0.118883	SwissTargetPrediction
CH10	(+)-Anomalin	TACR3	0.118883	SwissTargetPrediction
CH10	(+)-Anomalin	CASP3	0.118883	SwissTargetPrediction
CH10	(+)-Anomalin	CASP7	0.118883	SwissTargetPrediction
CH10	(+)-Anomalin	MAPK11	0.118883	SwissTargetPrediction
CH10	(+)-Anomalin	PABPC1	0.118883	SwissTargetPrediction
CH10	(+)-Anomalin	ITGAV	0.118883	SwissTargetPrediction
CH10	(+)-Anomalin	ITGB3	0.118883	SwissTargetPrediction
CH10	(+)-Anomalin	HTR1A	0.118883	SwissTargetPrediction
CH10	(+)-Anomalin	CFD	0.118883	SwissTargetPrediction
CH10	(+)-Anomalin	DRD2	0.118883	SwissTargetPrediction
CH10	(+)-Anomalin	TGM2	0.118883	SwissTargetPrediction
CH10	(+)-Anomalin	GRM4	0.118883	SwissTargetPrediction
CH10	(+)-Anomalin	TGM1	0.118883	SwissTargetPrediction
CH10	(+)-Anomalin	HTR7	0.118883	SwissTargetPrediction
CH10	(+)-Anomalin	HTR6	0.118883	SwissTargetPrediction
CH10	(+)-Anomalin	F13A1	0.118883	SwissTargetPrediction
CH10	(+)-Anomalin	PDE7A	0.118883	SwissTargetPrediction
CH10	(+)-Anomalin	PDE9A	0.118883	SwissTargetPrediction
CH10	(+)-Anomalin	NOS1	0.118883	SwissTargetPrediction
CH10	(+)-Anomalin	PIM2	0.118883	SwissTargetPrediction
CH10	(+)-Anomalin	CCND3	0.118883	SwissTargetPrediction
CH10	(+)-Anomalin	CCND2	0.118883	SwissTargetPrediction
CH10	(+)-Anomalin	TRPV1	0.118883	SwissTargetPrediction
CH10	(+)-Anomalin	TRPA1	0.118883	SwissTargetPrediction
CH10	(+)-Anomalin	CPT1A	0.118883	SwissTargetPrediction
CH10	(+)-Anomalin	PFKFB3	0.118883	SwissTargetPrediction
CH10	(+)-Anomalin	NTRK2	0.118883	SwissTargetPrediction
CH10	(+)-Anomalin	NTRK3	0.118883	SwissTargetPrediction
CH10	(+)-Anomalin	CHRM4	0.118883	SwissTargetPrediction
CH10	(+)-Anomalin	FLT1	0.118883	SwissTargetPrediction
CH10	(+)-Anomalin	GRM2	0.118883	SwissTargetPrediction
CH10	(+)-Anomalin	IKBKB	0.118883	SwissTargetPrediction
CH10	(+)-Anomalin	CTSD	0.118883	SwissTargetPrediction
CH11	oleanolic acid	CD81	0.511228	SwissTargetPrediction
CH11	oleanolic acid	LTB4R	0.100634	SwissTargetPrediction
CH11	oleanolic acid	PTGS1	0.100634	SwissTargetPrediction
CH11	oleanolic acid	SIGMAR1	0.100634	SwissTargetPrediction
CH11	oleanolic acid	PTGER2	0.100634	SwissTargetPrediction
CH11	oleanolic acid	PTGER4	0.100634	SwissTargetPrediction
CH11	oleanolic acid	TOP1	0.100634	SwissTargetPrediction
CH11	oleanolic acid	PRKCH	0.100634	SwissTargetPrediction
CH11	oleanolic acid	PTGER1	0.100634	SwissTargetPrediction
CH11	oleanolic acid	GRIK1	0.100634	SwissTargetPrediction
CH11	oleanolic acid	GRIK2	0.100634	SwissTargetPrediction
CH11	oleanolic acid	CYSLTR1	0.100634	SwissTargetPrediction
CH11	oleanolic acid	MDM2	0.100634	SwissTargetPrediction
CH11	oleanolic acid	AGTR1	0.100634	SwissTargetPrediction
CH11	oleanolic acid	PTGIR	0.100634	SwissTargetPrediction
CH11	oleanolic acid	FFAR1	0.100634	SwissTargetPrediction
CH11	oleanolic acid	S1PR2	0.100634	SwissTargetPrediction
CH11	oleanolic acid	HSF1	0.100634	SwissTargetPrediction
CH11	oleanolic acid	NR1H4	0.100634	SwissTargetPrediction
CH11	oleanolic acid	CES1	0.100634	SwissTargetPrediction
CH11	oleanolic acid	CCR1	0.100634	SwissTargetPrediction
CH11	oleanolic acid	OGFRL1	0.100634	SwissTargetPrediction
CH12	Saikogenin F	HIF1A	0.120226	SwissTargetPrediction
CH12	Saikogenin F	GC	0.120226	SwissTargetPrediction
CH12	Saikogenin F	GPBAR1	0.120226	SwissTargetPrediction
CH12	Saikogenin F	GSK3A	0.120226	SwissTargetPrediction
CH12	Saikogenin F	GABRB3	0.120226	SwissTargetPrediction
CH12	Saikogenin F	GABRA3	0.120226	SwissTargetPrediction
CH12	Saikogenin F	GABRG2	0.120226	SwissTargetPrediction
CH12	Saikogenin F	GABRA2	0.120226	SwissTargetPrediction
CH12	Saikogenin F	NR1I2	0.120226	SwissTargetPrediction
CH12	Saikogenin F	LIMK1	0.120226	SwissTargetPrediction
CH12	Saikogenin F	INCENP	0.120226	SwissTargetPrediction
CH12	Saikogenin F	TTK	0.120226	SwissTargetPrediction
CH12	Saikogenin F	PSEN2	0.120226	SwissTargetPrediction
CH12	Saikogenin F	PSENEN	0.120226	SwissTargetPrediction
CH12	Saikogenin F	NCSTN	0.120226	SwissTargetPrediction
CH12	Saikogenin F	APH1A	0.120226	SwissTargetPrediction
CH12	Saikogenin F	PSEN1	0.120226	SwissTargetPrediction
CH12	Saikogenin F	APH1B	0.120226	SwissTargetPrediction
CH12	Saikogenin F	CHKA	0.120226	SwissTargetPrediction
CH12	Saikogenin F	CYP24A1	0.120226	SwissTargetPrediction
CH12	Saikogenin F	REN	0.120226	SwissTargetPrediction
CH12	Saikogenin F	CTSE	0.120226	SwissTargetPrediction
CH12	Saikogenin F	IL6ST	0.120226	SwissTargetPrediction
CH12	Saikogenin F	CDK8	0.120226	SwissTargetPrediction
CH12	Saikogenin F	PDK1	0.120226	SwissTargetPrediction
CH12	Saikogenin F	CYP27B1	0.120226	SwissTargetPrediction
CH17	Cyclocumarol	PRKCG	0.104672	SwissTargetPrediction
CH17	Cyclocumarol	PTK2B	0.104672	SwissTargetPrediction
CH17	Cyclocumarol	CSNK1D	0.104672	SwissTargetPrediction
CH17	Cyclocumarol	TK1	0.104672	SwissTargetPrediction
CH17	Cyclocumarol	PDGFRB	0.104672	SwissTargetPrediction
CH17	Cyclocumarol	MTNR1B	0.104672	SwissTargetPrediction
CH17	Cyclocumarol	FADS1	0.104672	SwissTargetPrediction
CH17	Cyclocumarol	PAK1	0.104672	SwissTargetPrediction
CH17	Cyclocumarol	CTSG	0.104672	SwissTargetPrediction
CH17	Cyclocumarol	ADRA2B	0.104672	SwissTargetPrediction
CH17	Cyclocumarol	MAPK8	0.104672	SwissTargetPrediction
CH17	Cyclocumarol	ADRA1B	0.104672	SwissTargetPrediction
CH17	Cyclocumarol	PDE2A	0.104672	SwissTargetPrediction
CH17	Cyclocumarol	MAPKAPK2	0.104672	SwissTargetPrediction
CH17	Cyclocumarol	CSNK1G1	0.104672	SwissTargetPrediction
CH17	Cyclocumarol	HMOX1	0.104672	SwissTargetPrediction
CH17	Cyclocumarol	HDAC3	0.104672	SwissTargetPrediction
CH17	Cyclocumarol	HDAC2	0.104672	SwissTargetPrediction
CH17	Cyclocumarol	ADORA2B	0.104672	SwissTargetPrediction
CH17	Cyclocumarol	FLT4	0.104672	SwissTargetPrediction
CH17	Cyclocumarol	FGFR1	0.104672	SwissTargetPrediction
A1	quercetin	CXCR1	1	SwissTargetPrediction
A1	quercetin	HSD17B1	0.395895	SwissTargetPrediction
A1	quercetin	MMP12	0.285288	SwissTargetPrediction
B1	Stigmasterol	NR1H2	0.106166	SwissTargetPrediction
B1	Stigmasterol	TBXAS1	0.106166	SwissTargetPrediction
B2	Psoralen	NFKB1	0.276836	SwissTargetPrediction
HQ1	Mairin	CDC25C	0.109013	SwissTargetPrediction
HQ1	Mairin	HSD17B3	0.100634	SwissTargetPrediction
HQ1	Mairin	GABBR1	0.100634	SwissTargetPrediction
HQ1	Mairin	GABRB2	0.100634	SwissTargetPrediction
HQ1	Mairin	TLR9	0.100634	SwissTargetPrediction
HQ1	Mairin	FABP2	0.100634	SwissTargetPrediction
HQ3	hederagenin	SRD5A2	0.120226	SwissTargetPrediction
HQ3	hederagenin	PTGDR2	0.120226	SwissTargetPrediction
HQ3	hederagenin	AMPD2	0.120226	SwissTargetPrediction
HQ3	hederagenin	IL6	0.120226	SwissTargetPrediction
HQ3	hederagenin	GLUL	0.120226	SwissTargetPrediction
HQ5	3,9-di-O-methylnissolin	PDE3A	0.101614	SwissTargetPrediction
HQ5	3,9-di-O-methylnissolin	PDE3B	0.101614	SwissTargetPrediction
HQ5	3,9-di-O-methylnissolin	PDGFRA	0.101614	SwissTargetPrediction
HQ5	3,9-di-O-methylnissolin	PDE4C	0.101614	SwissTargetPrediction
HQ5	3,9-di-O-methylnissolin	PRKCE	0.101614	SwissTargetPrediction
HQ5	3,9-di-O-methylnissolin	RPS6KA2	0.101614	SwissTargetPrediction
HQ5	3,9-di-O-methylnissolin	ICAM1	0.101614	SwissTargetPrediction
HQ5	3,9-di-O-methylnissolin	SELE	0.101614	SwissTargetPrediction
HQ5	3,9-di-O-methylnissolin	MAPK10	0.101614	SwissTargetPrediction
HQ5	3,9-di-O-methylnissolin	LRRK2	0.101614	SwissTargetPrediction
HQ5	3,9-di-O-methylnissolin	NPBWR1	0.101614	SwissTargetPrediction
HQ5	3,9-di-O-methylnissolin	RET	0.101614	SwissTargetPrediction
HQ5	3,9-di-O-methylnissolin	TUBB1	0.101614	SwissTargetPrediction
HQ5	3,9-di-O-methylnissolin	SIRT1	0.101614	SwissTargetPrediction
HQ5	3,9-di-O-methylnissolin	TGFBR1	0.101614	SwissTargetPrediction
HQ5	3,9-di-O-methylnissolin	PPP1CA	0.101614	SwissTargetPrediction
HQ5	3,9-di-O-methylnissolin	PIK3CA	0.101614	SwissTargetPrediction
HQ5	3,9-di-O-methylnissolin	PRKCQ	0.101614	SwissTargetPrediction
HQ5	3,9-di-O-methylnissolin	LIPG	0.101614	SwissTargetPrediction
HQ5	3,9-di-O-methylnissolin	PRKCA	0.101614	SwissTargetPrediction
HQ5	3,9-di-O-methylnissolin	FPR1	0.101614	SwissTargetPrediction
HQ5	3,9-di-O-methylnissolin	FPR2	0.101614	SwissTargetPrediction
HQ5	3,9-di-O-methylnissolin	PLAT	0.101614	SwissTargetPrediction
HQ5	3,9-di-O-methylnissolin	PGGT1B	0.101614	SwissTargetPrediction
HQ5	3,9-di-O-methylnissolin	PRSS1	0.101614	SwissTargetPrediction
HQ5	3,9-di-O-methylnissolin	EPHX2	0.101614	SwissTargetPrediction
HQ5	3,9-di-O-methylnissolin	CLK1	0.101614	SwissTargetPrediction
HQ5	3,9-di-O-methylnissolin	CDK9	0.101614	SwissTargetPrediction
HQ5	3,9-di-O-methylnissolin	CCNT1	0.101614	SwissTargetPrediction
HQ5	3,9-di-O-methylnissolin	MAPK1	0.101614	SwissTargetPrediction
HQ5	3,9-di-O-methylnissolin	CHEK1	0.101614	SwissTargetPrediction
HQ5	3,9-di-O-methylnissolin	PIK3C2A	0.101614	SwissTargetPrediction
HQ5	3,9-di-O-methylnissolin	CCNA2	0.101614	SwissTargetPrediction
HQ5	3,9-di-O-methylnissolin	BDKRB2	0.101614	SwissTargetPrediction
HQ5	3,9-di-O-methylnissolin	PIK3C2B	0.101614	SwissTargetPrediction
HQ5	3,9-di-O-methylnissolin	BCL2A1	0.101614	SwissTargetPrediction
HQ5	3,9-di-O-methylnissolin	BAZ2B	0.101614	SwissTargetPrediction
HQ5	3,9-di-O-methylnissolin	CDK7	0.101614	SwissTargetPrediction
HQ5	3,9-di-O-methylnissolin	BAZ2A	0.101614	SwissTargetPrediction
HQ5	3,9-di-O-methylnissolin	UTS2R	0.101614	SwissTargetPrediction
HQ6	9,10-dimethoxypterocarpan-3-O-β-D-glucoside	EIF4A1	0.100634	SwissTargetPrediction
HQ6	9,10-dimethoxypterocarpan-3-O-β-D-glucoside	SLC29A1	0.100634	SwissTargetPrediction
HQ6	9,10-dimethoxypterocarpan-3-O-β-D-glucoside	SLC5A2	0.100634	SwissTargetPrediction
HQ6	9,10-dimethoxypterocarpan-3-O-β-D-glucoside	GBA	0.100634	SwissTargetPrediction
HQ6	9,10-dimethoxypterocarpan-3-O-β-D-glucoside	SLC28A2	0.100634	SwissTargetPrediction
HQ6	9,10-dimethoxypterocarpan-3-O-β-D-glucoside	SLC2A1	0.100634	SwissTargetPrediction
HQ6	9,10-dimethoxypterocarpan-3-O-β-D-glucoside	MGMT	0.100634	SwissTargetPrediction
HQ6	9,10-dimethoxypterocarpan-3-O-β-D-glucoside	ADK	0.100634	SwissTargetPrediction
HQ6	9,10-dimethoxypterocarpan-3-O-β-D-glucoside	HSPA5	0.100634	SwissTargetPrediction
HQ6	9,10-dimethoxypterocarpan-3-O-β-D-glucoside	LGALS3	0.100634	SwissTargetPrediction
HQ6	9,10-dimethoxypterocarpan-3-O-β-D-glucoside	LGALS1	0.100634	SwissTargetPrediction
HQ6	9,10-dimethoxypterocarpan-3-O-β-D-glucoside	LGALS7	0.100634	SwissTargetPrediction
HQ6	9,10-dimethoxypterocarpan-3-O-β-D-glucoside	LGALS9	0.100634	SwissTargetPrediction
HQ6	9,10-dimethoxypterocarpan-3-O-β-D-glucoside	DHODH	0.100634	SwissTargetPrediction
HQ7	(6aR,11aR)-9,10-dimethoxy-6a,11a-dihydro-6H-benzofurano[3,2-c]chromen-3-ol	WEE1	0.111502	SwissTargetPrediction
HQ7	(6aR,11aR)-9,10-dimethoxy-6a,11a-dihydro-6H-benzofurano[3,2-c]chromen-3-ol	COMT	0.111502	SwissTargetPrediction
HQ7	(6aR,11aR)-9,10-dimethoxy-6a,11a-dihydro-6H-benzofurano[3,2-c]chromen-3-ol	MKNK1	0.111502	SwissTargetPrediction
HQ7	(6aR,11aR)-9,10-dimethoxy-6a,11a-dihydro-6H-benzofurano[3,2-c]chromen-3-ol	HTT	0.111502	SwissTargetPrediction
HQ7	(6aR,11aR)-9,10-dimethoxy-6a,11a-dihydro-6H-benzofurano[3,2-c]chromen-3-ol	EZR	0.111502	SwissTargetPrediction
HQ7	(6aR,11aR)-9,10-dimethoxy-6a,11a-dihydro-6H-benzofurano[3,2-c]chromen-3-ol	EPHB2	0.111502	SwissTargetPrediction
HQ7	(6aR,11aR)-9,10-dimethoxy-6a,11a-dihydro-6H-benzofurano[3,2-c]chromen-3-ol	RAF1	0.111502	SwissTargetPrediction
HQ7	(6aR,11aR)-9,10-dimethoxy-6a,11a-dihydro-6H-benzofurano[3,2-c]chromen-3-ol	MIF	0.111502	SwissTargetPrediction
HQ7	(6aR,11aR)-9,10-dimethoxy-6a,11a-dihydro-6H-benzofurano[3,2-c]chromen-3-ol	ERN1	0.111502	SwissTargetPrediction
HQ7	(6aR,11aR)-9,10-dimethoxy-6a,11a-dihydro-6H-benzofurano[3,2-c]chromen-3-ol	BMP1	0.111502	SwissTargetPrediction
HQ7	(6aR,11aR)-9,10-dimethoxy-6a,11a-dihydro-6H-benzofurano[3,2-c]chromen-3-ol	MMP25	0.111502	SwissTargetPrediction
HQ7	(6aR,11aR)-9,10-dimethoxy-6a,11a-dihydro-6H-benzofurano[3,2-c]chromen-3-ol	MMP16	0.111502	SwissTargetPrediction
HQ7	(6aR,11aR)-9,10-dimethoxy-6a,11a-dihydro-6H-benzofurano[3,2-c]chromen-3-ol	ADAM10	0.111502	SwissTargetPrediction
HQ7	(6aR,11aR)-9,10-dimethoxy-6a,11a-dihydro-6H-benzofurano[3,2-c]chromen-3-ol	ALPL	0.111502	SwissTargetPrediction
HQ7	(6aR,11aR)-9,10-dimethoxy-6a,11a-dihydro-6H-benzofurano[3,2-c]chromen-3-ol	LNPEP	0.111502	SwissTargetPrediction
HQ7	(6aR,11aR)-9,10-dimethoxy-6a,11a-dihydro-6H-benzofurano[3,2-c]chromen-3-ol	NR4A1	0.111502	SwissTargetPrediction
HQ7	(6aR,11aR)-9,10-dimethoxy-6a,11a-dihydro-6H-benzofurano[3,2-c]chromen-3-ol	DBF4	0.111502	SwissTargetPrediction
HQ7	(6aR,11aR)-9,10-dimethoxy-6a,11a-dihydro-6H-benzofurano[3,2-c]chromen-3-ol	ALPG	0.111502	SwissTargetPrediction
HQ7	(6aR,11aR)-9,10-dimethoxy-6a,11a-dihydro-6H-benzofurano[3,2-c]chromen-3-ol	PLAA	0.111502	SwissTargetPrediction
HQ7	(6aR,11aR)-9,10-dimethoxy-6a,11a-dihydro-6H-benzofurano[3,2-c]chromen-3-ol	DNM1	0.111502	SwissTargetPrediction
HQ7	(6aR,11aR)-9,10-dimethoxy-6a,11a-dihydro-6H-benzofurano[3,2-c]chromen-3-ol	NCOR2	0.111502	SwissTargetPrediction
HQ7	(6aR,11aR)-9,10-dimethoxy-6a,11a-dihydro-6H-benzofurano[3,2-c]chromen-3-ol	HDAC5	0.111502	SwissTargetPrediction
HQ7	(6aR,11aR)-9,10-dimethoxy-6a,11a-dihydro-6H-benzofurano[3,2-c]chromen-3-ol	HDAC7	0.111502	SwissTargetPrediction
HQ7	(6aR,11aR)-9,10-dimethoxy-6a,11a-dihydro-6H-benzofurano[3,2-c]chromen-3-ol	NCOR1	0.111502	SwissTargetPrediction
HQ7	(6aR,11aR)-9,10-dimethoxy-6a,11a-dihydro-6H-benzofurano[3,2-c]chromen-3-ol	HDAC11	0.111502	SwissTargetPrediction
HQ7	(6aR,11aR)-9,10-dimethoxy-6a,11a-dihydro-6H-benzofurano[3,2-c]chromen-3-ol	HDAC4	0.111502	SwissTargetPrediction
HQ7	(6aR,11aR)-9,10-dimethoxy-6a,11a-dihydro-6H-benzofurano[3,2-c]chromen-3-ol	HDAC9	0.111502	SwissTargetPrediction
HQ7	(6aR,11aR)-9,10-dimethoxy-6a,11a-dihydro-6H-benzofurano[3,2-c]chromen-3-ol	MBD2	0.111502	SwissTargetPrediction
HQ7	(6aR,11aR)-9,10-dimethoxy-6a,11a-dihydro-6H-benzofurano[3,2-c]chromen-3-ol	CLK3	0.111502	SwissTargetPrediction
HQ7	(6aR,11aR)-9,10-dimethoxy-6a,11a-dihydro-6H-benzofurano[3,2-c]chromen-3-ol	DYRK2	0.111502	SwissTargetPrediction
HQ7	(6aR,11aR)-9,10-dimethoxy-6a,11a-dihydro-6H-benzofurano[3,2-c]chromen-3-ol	TUBB3	0.111502	SwissTargetPrediction
HQ7	(6aR,11aR)-9,10-dimethoxy-6a,11a-dihydro-6H-benzofurano[3,2-c]chromen-3-ol	ANPEP	0.111502	SwissTargetPrediction
HQ8	Bifendate	OXTR	0.106166	SwissTargetPrediction
HQ8	Bifendate	AVPR1A	0.106166	SwissTargetPrediction
HQ8	Bifendate	JUN	0.106166	SwissTargetPrediction
HQ9	formononetin	MGAM	0.149733	SwissTargetPrediction
HQ9	formononetin	HTR2A	0.149733	SwissTargetPrediction
HQ9	formononetin	HTR2C	0.149733	SwissTargetPrediction
HQ9	formononetin	ESRRB	0.149733	SwissTargetPrediction
HQ9	formononetin	CBR1	0.141522	SwissTargetPrediction
HQ9	formononetin	MAOB	0.100579	SwissTargetPrediction
HQ9	formononetin	PON1	0.100579	SwissTargetPrediction
HQ9	formononetin	STS	0.100579	SwissTargetPrediction
HQ9	formononetin	ERCC5	0.100579	SwissTargetPrediction
HQ9	formononetin	FEN1	0.100579	SwissTargetPrediction
HQ12	FA	TYMS	0.784022	SwissTargetPrediction
HQ12	FA	SLC19A1	0.214409	SwissTargetPrediction
HQ12	FA	SLC46A1	0.15634	SwissTargetPrediction
HQ12	FA	FOLR1	0.139714	SwissTargetPrediction
HQ12	FA	HDAC8	0.139714	SwissTargetPrediction
HQ12	FA	FPGS	0.139714	SwissTargetPrediction
HQ12	FA	FOLR2	0.139714	SwissTargetPrediction
HQ12	FA	HDAC6	0.106543	SwissTargetPrediction
HQ12	FA	HDAC1	0.106543	SwissTargetPrediction
HQ12	FA	GART	0.106543	SwissTargetPrediction
HQ12	FA	ATIC	0.106543	SwissTargetPrediction
HQ12	FA	SLC5A1	0.106543	SwissTargetPrediction
HQ15	(3R)-3-(2-hydroxy-3,4-dimethoxyphenyl)chroman-7-ol	ALOX15B	0.135202	SwissTargetPrediction
HQ15	(3R)-3-(2-hydroxy-3,4-dimethoxyphenyl)chroman-7-ol	HSP90AB1	0.111502	SwissTargetPrediction
HQ15	(3R)-3-(2-hydroxy-3,4-dimethoxyphenyl)chroman-7-ol	DAO	0.111502	SwissTargetPrediction
HQ15	(3R)-3-(2-hydroxy-3,4-dimethoxyphenyl)chroman-7-ol	HDAC10	0.111502	SwissTargetPrediction
HQ15	(3R)-3-(2-hydroxy-3,4-dimethoxyphenyl)chroman-7-ol	PIM3	0.111502	SwissTargetPrediction
HQ15	(3R)-3-(2-hydroxy-3,4-dimethoxyphenyl)chroman-7-ol	RPS6KA1	0.111502	SwissTargetPrediction
HQ15	(3R)-3-(2-hydroxy-3,4-dimethoxyphenyl)chroman-7-ol	BAD	0.111502	SwissTargetPrediction
HQ15	(3R)-3-(2-hydroxy-3,4-dimethoxyphenyl)chroman-7-ol	PRF1	0.111502	SwissTargetPrediction
HQ15	(3R)-3-(2-hydroxy-3,4-dimethoxyphenyl)chroman-7-ol	IMPDH1	0.111502	SwissTargetPrediction
HQ15	(3R)-3-(2-hydroxy-3,4-dimethoxyphenyl)chroman-7-ol	SGK1	0.111502	SwissTargetPrediction
HQ15	(3R)-3-(2-hydroxy-3,4-dimethoxyphenyl)chroman-7-ol	TAAR1	0.111502	SwissTargetPrediction
HQ15	(3R)-3-(2-hydroxy-3,4-dimethoxyphenyl)chroman-7-ol	EP300	0.111502	SwissTargetPrediction
HQ15	(3R)-3-(2-hydroxy-3,4-dimethoxyphenyl)chroman-7-ol	FCER2	0.111502	SwissTargetPrediction
HQ17	7-O-methylisomucronulatol	F3	0.101614	SwissTargetPrediction
HQ17	7-O-methylisomucronulatol	ADAMTS5	0.101614	SwissTargetPrediction
HQ17	7-O-methylisomucronulatol	NEK1	0.101614	SwissTargetPrediction
HQ17	7-O-methylisomucronulatol	EGLN1	0.101614	SwissTargetPrediction
HQ17	7-O-methylisomucronulatol	NDUFA4	0.101614	SwissTargetPrediction
HQ17	7-O-methylisomucronulatol	GUSB	0.101614	SwissTargetPrediction
HQ17	7-O-methylisomucronulatol	CLK4	0.101614	SwissTargetPrediction
HQ17	7-O-methylisomucronulatol	CLK2	0.101614	SwissTargetPrediction
HQ17	7-O-methylisomucronulatol	DYRK1B	0.101614	SwissTargetPrediction
HQ17	7-O-methylisomucronulatol	LDHB	0.101614	SwissTargetPrediction
HQ17	7-O-methylisomucronulatol	ATP4B	0.101614	SwissTargetPrediction
HQ17	7-O-methylisomucronulatol	ATP4A	0.101614	SwissTargetPrediction
HQ17	7-O-methylisomucronulatol	FASN	0.101614	SwissTargetPrediction
HQ17	7-O-methylisomucronulatol	RPS6KB1	0.101614	SwissTargetPrediction
HQ17	7-O-methylisomucronulatol	FYN	0.101614	SwissTargetPrediction
HQ17	7-O-methylisomucronulatol	EPHA2	0.101614	SwissTargetPrediction
HQ17	7-O-methylisomucronulatol	BLK	0.101614	SwissTargetPrediction
HQ17	7-O-methylisomucronulatol	CSK	0.101614	SwissTargetPrediction
HQ17	7-O-methylisomucronulatol	BMX	0.101614	SwissTargetPrediction
HQ17	7-O-methylisomucronulatol	LYN	0.101614	SwissTargetPrediction
HQ17	7-O-methylisomucronulatol	EPHA5	0.101614	SwissTargetPrediction
HQ17	7-O-methylisomucronulatol	EPHA4	0.101614	SwissTargetPrediction
HQ17	7-O-methylisomucronulatol	TXK	0.101614	SwissTargetPrediction
HQ17	7-O-methylisomucronulatol	FGR	0.101614	SwissTargetPrediction
HQ17	7-O-methylisomucronulatol	EPHA6	0.101614	SwissTargetPrediction
HQ17	7-O-methylisomucronulatol	PTK6	0.101614	SwissTargetPrediction
HQ17	7-O-methylisomucronulatol	PDF	0.101614	SwissTargetPrediction
HQ17	7-O-methylisomucronulatol	EPHB3	0.101614	SwissTargetPrediction
HQ17	7-O-methylisomucronulatol	EPHA3	0.101614	SwissTargetPrediction
HQ17	7-O-methylisomucronulatol	BTK	0.101614	SwissTargetPrediction
HQ17	7-O-methylisomucronulatol	TYRO3	0.101614	SwissTargetPrediction
HQ17	7-O-methylisomucronulatol	COQ8B	0.101614	SwissTargetPrediction
HQ17	7-O-methylisomucronulatol	EPHA1	0.101614	SwissTargetPrediction
HQ17	7-O-methylisomucronulatol	FKBP1A	0.101614	SwissTargetPrediction
HQ17	7-O-methylisomucronulatol	CHRNA7	0.101614	SwissTargetPrediction
HQ17	7-O-methylisomucronulatol	QPCTL	0.101614	SwissTargetPrediction
HQ19	astragalosideI	VEGFA	0.104719	SwissTargetPrediction
HQ19	astragalosideI	FGF1	0.104719	SwissTargetPrediction
HQ19	astragalosideI	FGF2	0.104719	SwissTargetPrediction
HQ19	astragalosideI	HPSE	0.104719	SwissTargetPrediction
HQ19	astragalosideI	GLRA2	0.104719	SwissTargetPrediction
HQ19	astragalosideI	HTR2B	0.104719	SwissTargetPrediction
HQ19	astragalosideI	DRD1	0.104719	SwissTargetPrediction
HQ19	astragalosideI	ADRA1D	0.104719	SwissTargetPrediction
HQ19	astragalosideI	ADRA1A	0.104719	SwissTargetPrediction
HQ19	astragalosideI	DRD3	0.104719	SwissTargetPrediction
HQ19	astragalosideI	CYP2D6	0.104719	SwissTargetPrediction
HQ19	astragalosideI	HTR1B	0.104719	SwissTargetPrediction
HQ19	astragalosideI	OPRK1	0.104719	SwissTargetPrediction
HQ19	astragalosideI	PPM1A	0.104719	SwissTargetPrediction
HQ19	astragalosideI	MLNR	0.104719	SwissTargetPrediction
HQ19	astragalosideI	LGALS4	0.104719	SwissTargetPrediction
HQ19	astragalosideI	LGALS8	0.104719	SwissTargetPrediction
HQ19	astragalosideI	TRPV4	0.104719	SwissTargetPrediction
HQ19	astragalosideI	BCL2L1	0.104719	SwissTargetPrediction
HQ19	astragalosideI	STAT3	0.104719	SwissTargetPrediction
DG2	6,7,3',8'-diligustilide	LIPE	0.115737	SwissTargetPrediction
DG2	6,7,3',8'-diligustilide	CTSB	0.115737	SwissTargetPrediction
DG2	6,7,3',8'-diligustilide	CTRB1	0.115737	SwissTargetPrediction
DG2	6,7,3',8'-diligustilide	KCNA5	0.115737	SwissTargetPrediction
DG2	6,7,3',8'-diligustilide	EPHX1	0.115737	SwissTargetPrediction
DG2	6,7,3',8'-diligustilide	CTSH	0.115737	SwissTargetPrediction
DG2	6,7,3',8'-diligustilide	SCN5A	0.115737	SwissTargetPrediction
DG2	6,7,3',8'-diligustilide	TRPC6	0.115737	SwissTargetPrediction
DG2	6,7,3',8'-diligustilide	TRPC3	0.115737	SwissTargetPrediction
DG2	6,7,3',8'-diligustilide	MC4R	0.115737	SwissTargetPrediction
DG2	6,7,3',8'-diligustilide	MCHR1	0.115737	SwissTargetPrediction
DG2	6,7,3',8'-diligustilide	CHRM5	0.115737	SwissTargetPrediction
DG2	6,7,3',8'-diligustilide	CYP26A1	0.115737	SwissTargetPrediction
DG2	6,7,3',8'-diligustilide	CACNA1C	0.115737	SwissTargetPrediction
DG2	6,7,3',8'-diligustilide	IRAK4	0.115737	SwissTargetPrediction
DG2	6,7,3',8'-diligustilide	MTNR1A	0.115737	SwissTargetPrediction
DG2	6,7,3',8'-diligustilide	IDO1	0.115737	SwissTargetPrediction
DG2	6,7,3',8'-diligustilide	ECE1	0.115737	SwissTargetPrediction
DG2	6,7,3',8'-diligustilide	GPR55	0.115737	SwissTargetPrediction
DG3	(3S)-3-butyl-3H-isobenzofuran-1-one	KCNK2	1	SwissTargetPrediction
DG7	palmitic acid	SLC22A6	0.207866	SwissTargetPrediction
DG8	isoeugenol	CYP1A2	0.249992	SwissTargetPrediction
DG8	isoeugenol	RELA	0.183364	SwissTargetPrediction
DG8	isoeugenol	CYP1A1	0.133391	SwissTargetPrediction
DG8	isoeugenol	NFE2L2	0.133391	SwissTargetPrediction
DG8	isoeugenol	KCNMA1	0.125076	SwissTargetPrediction
DG8	isoeugenol	CYP2C9	0.125076	SwissTargetPrediction
DG8	isoeugenol	CYP3A4	0.125076	SwissTargetPrediction
DG8	isoeugenol	DCTPP1	0.125076	SwissTargetPrediction
DG8	isoeugenol	GPR84	0.125076	SwissTargetPrediction
DG8	isoeugenol	CHRNA3	0.125076	SwissTargetPrediction
DG8	isoeugenol	CHRNA4	0.125076	SwissTargetPrediction
DG8	isoeugenol	SRD5A1	0.116739	SwissTargetPrediction
DG8	isoeugenol	METAP2	0.116739	SwissTargetPrediction
DG8	isoeugenol	CHRNB2	0.116739	SwissTargetPrediction
DG8	isoeugenol	CHRNB4	0.116739	SwissTargetPrediction
DG8	isoeugenol	BRAF	0.116739	SwissTargetPrediction
DG8	isoeugenol	DUSP3	0.116739	SwissTargetPrediction
DG8	isoeugenol	TDO2	0.116739	SwissTargetPrediction
KDD1	coptisine	CDC42	0.104672	SwissTargetPrediction
KDD1	coptisine	RAC1	0.104672	SwissTargetPrediction
KDD1	coptisine	CHEK2	0.104672	SwissTargetPrediction
KDD2	stylopine	DRD5	0.104672	SwissTargetPrediction
KDD2	stylopine	ADRB2	0.104672	SwissTargetPrediction
KDD2	stylopine	ADRB3	0.104672	SwissTargetPrediction
KDD2	stylopine	CHRNA2	0.104672	SwissTargetPrediction
KDD2	stylopine	RBBP9	0.104672	SwissTargetPrediction
KDD2	stylopine	KCNN1	0.104672	SwissTargetPrediction
KDD2	stylopine	KCNN2	0.104672	SwissTargetPrediction
KDD2	stylopine	CCNA1	0.104672	SwissTargetPrediction
KDD2	stylopine	SLC18A2	0.104672	SwissTargetPrediction
KDD2	stylopine	SCN4A	0.104672	SwissTargetPrediction
KDD2	stylopine	KDM1A	0.104672	SwissTargetPrediction
KDD2	stylopine	SLC1A3	0.104672	SwissTargetPrediction
KDD3	Oxysanguinarine	PGK1	0.10934	SwissTargetPrediction
KDD3	Oxysanguinarine	TEK	0.10934	SwissTargetPrediction
KDD3	Oxysanguinarine	XBP1	0.10934	SwissTargetPrediction
KDD3	Oxysanguinarine	ACVRL1	0.10934	SwissTargetPrediction
KDD3	Oxysanguinarine	CCNH	0.10934	SwissTargetPrediction
KDD3	Oxysanguinarine	TBK1	0.10934	SwissTargetPrediction
KDD3	Oxysanguinarine	VCAM1	0.10934	SwissTargetPrediction
KDD3	Oxysanguinarine	ERBB2	0.10934	SwissTargetPrediction
KDD3	Oxysanguinarine	SLC9A1	0.10934	SwissTargetPrediction
KDD3	Oxysanguinarine	DCK	0.10934	SwissTargetPrediction
KDD3	Oxysanguinarine	CCNC	0.10934	SwissTargetPrediction
KDD4	Fumarine	TRHR	0.10934	SwissTargetPrediction
KDD4	Fumarine	MKNK2	0.10934	SwissTargetPrediction
KDD4	Fumarine	PDPK1	0.10934	SwissTargetPrediction
KDD4	Fumarine	SIRT3	0.10934	SwissTargetPrediction
KDD4	Fumarine	SIRT2	0.10934	SwissTargetPrediction
KDD5	bicuculline	SLC22A2	0.129284	SwissTargetPrediction
KDD5	bicuculline	RXRA	0.113286	SwissTargetPrediction
KDD5	bicuculline	PRMT6	0.113286	SwissTargetPrediction
KDD5	bicuculline	PRMT8	0.113286	SwissTargetPrediction
KDD5	bicuculline	PRMT1	0.113286	SwissTargetPrediction
KDD5	bicuculline	HRH1	0.113286	SwissTargetPrediction
KDD5	bicuculline	HTR3A	0.113286	SwissTargetPrediction
KDD5	bicuculline	LTA4H	0.113286	SwissTargetPrediction
KDD5	bicuculline	NMT1	0.113286	SwissTargetPrediction
KDD5	bicuculline	DYRK1A	0.113286	SwissTargetPrediction
KDD5	bicuculline	PBK	0.113286	SwissTargetPrediction
KDD5	bicuculline	FAP	0.113286	SwissTargetPrediction
KDD5	bicuculline	DPP9	0.113286	SwissTargetPrediction
KDD5	bicuculline	TDP1	0.113286	SwissTargetPrediction
KDD5	bicuculline	NQO1	0.113286	SwissTargetPrediction
KDD6	(S)-Cheilanthifoline	ADRB1	0.104672	SwissTargetPrediction
KDD6	(S)-Cheilanthifoline	SLC47A1	0.104672	SwissTargetPrediction
KDD6	(S)-Cheilanthifoline	TBXA2R	0.104672	SwissTargetPrediction
KDD6	(S)-Cheilanthifoline	KIF11	0.104672	SwissTargetPrediction
KDD6	(S)-Cheilanthifoline	HTR1D	0.104672	SwissTargetPrediction
KDD6	(S)-Cheilanthifoline	HTR5A	0.104672	SwissTargetPrediction
KDD6	(S)-Cheilanthifoline	MELK	0.104672	SwissTargetPrediction
KDD6	(S)-Cheilanthifoline	NOX1	0.104672	SwissTargetPrediction
KDD6	(S)-Cheilanthifoline	MPI	0.104672	SwissTargetPrediction
KDD6	(S)-Cheilanthifoline	CXCR4	0.104672	SwissTargetPrediction
KDD7	corycavine	PRKCB	0.113286	SwissTargetPrediction
KDD7	corycavine	TAOK3	0.113286	SwissTargetPrediction
KDD7	corycavine	PRKCZ	0.113286	SwissTargetPrediction
KDD7	corycavine	TGFB1	0.113286	SwissTargetPrediction
KDD8	coryincine	OPRL1	0.141778	SwissTargetPrediction
KDD8	coryincine	KCNH2	0.10934	SwissTargetPrediction
KDD8	coryincine	ENPP2	0.10934	SwissTargetPrediction
KDD8	coryincine	KCNA3	0.10934	SwissTargetPrediction
KDD8	coryincine	SPHK2	0.10934	SwissTargetPrediction
KDD8	coryincine	SPHK1	0.10934	SwissTargetPrediction
KDD8	coryincine	AKT2	0.10934	SwissTargetPrediction
KDD8	coryincine	H1F0	0.10934	SwissTargetPrediction
KDD8	coryincine	EBP	0.10934	SwissTargetPrediction
KDD8	coryincine	SSTR2	0.10934	SwissTargetPrediction
KDD8	coryincine	LSS	0.10934	SwissTargetPrediction
KDD8	coryincine	PDE1C	0.10934	SwissTargetPrediction
KDD8	coryincine	KCNJ1	0.10934	SwissTargetPrediction
KDD8	coryincine	ATAD2	0.10934	SwissTargetPrediction
KDD8	coryincine	DUT	0.10934	SwissTargetPrediction
KDD8	coryincine	SSTR3	0.10934	SwissTargetPrediction
KDD8	coryincine	NOS3	0.10934	SwissTargetPrediction
KDD8	coryincine	KCNQ1	0.10934	SwissTargetPrediction
KDD8	coryincine	LIMK2	0.10934	SwissTargetPrediction
KDD8	coryincine	SSTR4	0.10934	SwissTargetPrediction
KDD8	coryincine	ACKR3	0.10934	SwissTargetPrediction
KDD8	coryincine	SLC6A5	0.10934	SwissTargetPrediction
KDD8	coryincine	AGPAT2	0.10934	SwissTargetPrediction
KDD9	isocorynoline	PTPRCAP	0.230989	SwissTargetPrediction
KDD9	isocorynoline	TH	0.105608	SwissTargetPrediction
KDD11	noryuziphine	DPP4	0.108771	SwissTargetPrediction
KDD11	noryuziphine	CHRNB1	0.100579	SwissTargetPrediction
KDD11	noryuziphine	CHRNA1	0.100579	SwissTargetPrediction
KDD11	noryuziphine	CHRNG	0.100579	SwissTargetPrediction
KDD11	noryuziphine	CHRND	0.100579	SwissTargetPrediction
KDD11	noryuziphine	PNMT	0.100579	SwissTargetPrediction
KDD11	noryuziphine	HASPIN	0.100579	SwissTargetPrediction
KDD11	noryuziphine	CTSC	0.100579	SwissTargetPrediction
KDD11	noryuziphine	PKN2	0.100579	SwissTargetPrediction
KDD11	noryuziphine	RPS6KA5	0.100579	SwissTargetPrediction
KDD11	noryuziphine	HTR1F	0.100579	SwissTargetPrediction
KDD11	noryuziphine	QDPR	0.100579	SwissTargetPrediction
KDD11	noryuziphine	DPP7	0.100579	SwissTargetPrediction
KDD11	noryuziphine	CARM1	0.100579	SwissTargetPrediction
KDD11	noryuziphine	KCNN3	0.100579	SwissTargetPrediction
KDD11	noryuziphine	DPP8	0.100579	SwissTargetPrediction
KDD11	noryuziphine	CASR	0.100579	SwissTargetPrediction
KDD11	noryuziphine	ARHGDIA	0.100579	SwissTargetPrediction
KDD11	noryuziphine	PRCP	0.100579	SwissTargetPrediction
KDD11	noryuziphine	KLKB1	0.100579	SwissTargetPrediction
KDD11	noryuziphine	TACR1	0.100579	SwissTargetPrediction
KDD12	yuziphine	PDE1A	0.111502	SwissTargetPrediction
KDD12	yuziphine	KISS1R	0.111502	SwissTargetPrediction
KDD13	acetylcorynoline	ITK	0.106166	SwissTargetPrediction
KDD13	acetylcorynoline	PLK4	0.106166	SwissTargetPrediction
KDD13	acetylcorynoline	ROS1	0.106166	SwissTargetPrediction
KDD13	acetylcorynoline	ALDH3A1	0.106166	SwissTargetPrediction
KDD13	acetylcorynoline	CALCRL	0.106166	SwissTargetPrediction
KDD13	acetylcorynoline	STAT6	0.106166	SwissTargetPrediction
KDD14	tetrahydropalmatine	PLK3	0.10934	SwissTargetPrediction
KDD14	tetrahydropalmatine	PLK2	0.10934	SwissTargetPrediction
KDD14	tetrahydropalmatine	CACNA2D1	0.10934	SwissTargetPrediction
KDD14	tetrahydropalmatine	PRKD2	0.10934	SwissTargetPrediction
KDD15	8-oxocorynoline	ADA	0.115737	SwissTargetPrediction
KDD15	8-oxocorynoline	ERBB4	0.115737	SwissTargetPrediction
KDD15	8-oxocorynoline	PRKCD	0.115737	SwissTargetPrediction
KDD15	8-oxocorynoline	CX3CR1	0.115737	SwissTargetPrediction
KDD15	8-oxocorynoline	CSNK2A2	0.115737	SwissTargetPrediction
KDD15	8-oxocorynoline	CSNK1E	0.115737	SwissTargetPrediction
KDD15	8-oxocorynoline	MERTK	0.115737	SwissTargetPrediction
KDD15	8-oxocorynoline	TKT	0.115737	SwissTargetPrediction
KDD15	8-oxocorynoline	ASAH1	0.115737	SwissTargetPrediction
CH1	Linoleyl acetate	RPL8	0.215	STITCH
CH1	Linoleyl acetate	KCNH1	0.173	STITCH
CH1	Linoleyl acetate	CES5A	0.162	STITCH
CH2	Baicalin	BECN1	0.832	STITCH
CH2	Baicalin	CASP3	0.829	STITCH
CH2	Baicalin	ALOX5	0.818	STITCH
CH2	Baicalin	TLR4	0.816	STITCH
CH2	Baicalin	TLR2	0.816	STITCH
CH2	Baicalin	VEGFA	0.815	STITCH
CH2	Baicalin	NT5E	0.8	STITCH
CH2	Baicalin	CDX1	0.8	STITCH
CH2	Baicalin	FOXP3	0.8	STITCH
CH2	Baicalin	PDGFB	0.8	STITCH
CH2	Baicalin	MYC	0.8	STITCH
CH2	Baicalin	IL17A	0.8	STITCH
CH2	Baicalin	EGF	0.8	STITCH
CH2	Baicalin	HIF1A	0.8	STITCH
CH2	Baicalin	CDX2	0.8	STITCH
CH2	Baicalin	CYP2E1	0.8	STITCH
CH2	Baicalin	REN	0.8	STITCH
CH2	Baicalin	CYP3A4	0.8	STITCH
CH2	Baicalin	CASP8	0.784	STITCH
CH2	Baicalin	NOS2	0.733	STITCH
CH2	Baicalin	CASP10	0.712	STITCH
CH2	Baicalin	PKM	0.7	STITCH
CH2	Baicalin	NOTCH1	0.7	STITCH
CH2	Baicalin	TNF	0.697	STITCH
CH2	Baicalin	NOS1	0.596	STITCH
CH2	Baicalin	NOS3	0.596	STITCH
CH2	Baicalin	MTRR	0.457	STITCH
CH2	Baicalin	POR	0.457	STITCH
CH2	Baicalin	LTA	0.366	STITCH
CH2	Baicalin	TYW1	0.335	STITCH
CH2	Baicalin	NDOR1	0.335	STITCH
CH2	Baicalin	VAT1L	0.297	STITCH
CH2	Baicalin	CRYZL1	0.297	STITCH
CH2	Baicalin	RTN4IP1	0.297	STITCH
CH2	Baicalin	TP53I3	0.297	STITCH
CH2	Baicalin	VAT1	0.297	STITCH
CH4	Areapillin	GPT	0.197	STITCH
CH4	Areapillin	GPT2	0.197	STITCH
CH5	Cubebin	SULT1C4	0.214	STITCH
CH5	Cubebin	SULT1B1	0.214	STITCH
CH5	Cubebin	SULT1C3	0.214	STITCH
CH5	Cubebin	SULT1A1	0.181	STITCH
CH5	Cubebin	SULT1E1	0.181	STITCH
CH5	Cubebin	SULT1C2	0.181	STITCH
CH5	Cubebin	SULT1A4	0.166	STITCH
CH5	Cubebin	SULT1A2	0.166	STITCH
CH5	Cubebin	SULT1A3	0.166	STITCH
CH5	Cubebin	GUCA2A	0.166	STITCH
CH6	Sainfuran	ESR1	0.582	STITCH
CH6	Sainfuran	ESR2	0.24	STITCH
CH7	Troxerutin	BLOC1S2	0.17	STITCH
CH7	Troxerutin	REG1B	0.169	STITCH
CH7	Troxerutin	FN3K	0.167	STITCH
CH7	Troxerutin	CSTF1	0.159	STITCH
CH7	Troxerutin	BRAP	0.152	STITCH
CH7	Troxerutin	ERCC5	0.15	STITCH
CH19	Saikosaponin B	FDPS	0.274	STITCH
CH19	Saikosaponin B	RUSC1	0.274	STITCH
CH19	Saikosaponin B	TNS1	0.23	STITCH
CH19	Saikosaponin B	TNS3	0.23	STITCH
CH19	Saikosaponin B	GAK	0.23	STITCH
CH19	Saikosaponin B	TPTE	0.23	STITCH
CH19	Saikosaponin B	TENC1	0.23	STITCH
CH19	Saikosaponin B	TPTE2	0.23	STITCH
CH19	Saikosaponin B	PTEN	0.23	STITCH
CH19	Saikosaponin B	DNAJC6	0.23	STITCH
CH19	Saikosaponin B	LSS	0.19	STITCH
CH19	Saikosaponin B	HBS1L	0.186	STITCH
CH19	Saikosaponin B	PDSS2	0.176	STITCH
CH19	Saikosaponin B	PDSS1	0.176	STITCH
CH19	Saikosaponin B	GGPS1	0.176	STITCH
CH19	Saikosaponin B	MBNL1	0.157	STITCH
CH19	Saikosaponin B	MVD	0.151	STITCH
CH9	scoparone	DECR1	0.836	STITCH
CH9	scoparone	PPIG	0.533	STITCH
CH9	scoparone	CYP2B6	0.347	STITCH
CH9	scoparone	AMACR	0.318	STITCH
CH9	scoparone	C7orf10	0.318	STITCH
CH9	scoparone	NR1H4	0.276	STITCH
CH9	scoparone	DET1	0.267	STITCH
CH9	scoparone	ZNF407	0.263	STITCH
CH9	scoparone	RARB	0.235	STITCH
CH9	scoparone	ADH1B	0.234	STITCH
CH9	scoparone	CYP2C18	0.227	STITCH
CH9	scoparone	CYP2J2	0.227	STITCH
CH9	scoparone	CYP2A13	0.227	STITCH
CH9	scoparone	CYP2C8	0.227	STITCH
CH9	scoparone	CYP2F1	0.227	STITCH
CH9	scoparone	CYP2C19	0.227	STITCH
CH9	scoparone	CYP2A6	0.227	STITCH
CH9	scoparone	CYP2D6	0.227	STITCH
CH9	scoparone	CYP2C9	0.227	STITCH
CH9	scoparone	CALM2	0.219	STITCH
CH9	scoparone	YWHAZ	0.217	STITCH
CH9	scoparone	SFN	0.217	STITCH
CH9	scoparone	YWHAG	0.217	STITCH
CH9	scoparone	YWHAB	0.217	STITCH
CH9	scoparone	YWHAQ	0.217	STITCH
CH9	scoparone	YWHAE	0.217	STITCH
CH9	scoparone	YWHAH	0.217	STITCH
CH9	scoparone	NR1I3	0.207	STITCH
CH9	scoparone	PECR	0.205	STITCH
CH9	scoparone	DHRS1	0.205	STITCH
CH9	scoparone	DECR2	0.205	STITCH
CH9	scoparone	DHRS2	0.205	STITCH
CH9	scoparone	HSD17B14	0.205	STITCH
CH9	scoparone	HSDL2	0.205	STITCH
CH9	scoparone	DHRS4	0.205	STITCH
CH9	scoparone	BDH2	0.205	STITCH
CH9	scoparone	DHRS4L2	0.205	STITCH
CH9	scoparone	CYP2U1	0.202	STITCH
CH9	scoparone	CYP2R1	0.202	STITCH
CH9	scoparone	CYP2A7	0.202	STITCH
CH11	oleanolic acid	UGT2B11	0.9	STITCH
CH11	oleanolic acid	UGT2B10	0.9	STITCH
CH11	oleanolic acid	NFE2L2	0.858	STITCH
CH11	oleanolic acid	NQO1	0.847	STITCH
CH11	oleanolic acid	PPARA	0.817	STITCH
CH11	oleanolic acid	PTGIR	0.8	STITCH
CH11	oleanolic acid	NAMPT	0.8	STITCH
CH11	oleanolic acid	CYP1A2	0.7	STITCH
CH11	oleanolic acid	TOP1	0.7	STITCH
CH11	oleanolic acid	TOP2A	0.7	STITCH
CH11	oleanolic acid	HMGB1	0.7	STITCH
CH11	oleanolic acid	AKR1B10	0.497	STITCH
CH11	oleanolic acid	KEAP1	0.386	STITCH
CH11	oleanolic acid	GSR	0.359	STITCH
CH11	oleanolic acid	PTPN1	0.337	STITCH
CH11	oleanolic acid	GPBAR1	0.333	STITCH
CH11	oleanolic acid	POLB	0.302	STITCH
CH11	oleanolic acid	HMGCR	0.288	STITCH
CH11	oleanolic acid	IDI1	0.263	STITCH
CH11	oleanolic acid	IDI2	0.263	STITCH
CH11	oleanolic acid	ACACA	0.251	STITCH
CH11	oleanolic acid	ACACB	0.251	STITCH
CH11	oleanolic acid	CARNS1	0.251	STITCH
CH11	oleanolic acid	PTPN2	0.235	STITCH
CH11	oleanolic acid	PLA2G1B	0.235	STITCH
CH11	oleanolic acid	NMU	0.225	STITCH
CH11	oleanolic acid	HMGCS2	0.203	STITCH
CH11	oleanolic acid	HMGCS1	0.203	STITCH
CH11	oleanolic acid	PTGS2	0.201	STITCH
CH11	oleanolic acid	CAT	0.201	STITCH
CH11	oleanolic acid	UGT1A3	0.2	STITCH
CH11	oleanolic acid	UGT1A7	0.2	STITCH
CH11	oleanolic acid	UGT1A8	0.2	STITCH
CH11	oleanolic acid	UGT1A9	0.2	STITCH
CH11	oleanolic acid	RNASE3	0.2	STITCH
CH11	oleanolic acid	UGT1A10	0.2	STITCH
CH11	oleanolic acid	GSS	0.2	STITCH
CH11	oleanolic acid	UGT1A4	0.2	STITCH
CH11	oleanolic acid	UGT1A5	0.2	STITCH
CH11	oleanolic acid	CUL3	0.193	STITCH
CH11	oleanolic acid	GPX1	0.189	STITCH
CH11	oleanolic acid	GPX2	0.189	STITCH
CH11	oleanolic acid	HMOX2	0.189	STITCH
CH11	oleanolic acid	ACSF3	0.182	STITCH
CH11	oleanolic acid	RBL2	0.178	STITCH
CH11	oleanolic acid	POLI	0.175	STITCH
CH11	oleanolic acid	POLH	0.175	STITCH
CH20	3'-O-Acetylsaikosaponin D_qt	CASP9	0.7	STITCH
CH20	3'-O-Acetylsaikosaponin D_qt	QARS	0.27	STITCH
CH20	3'-O-Acetylsaikosaponin D_qt	EPRS	0.27	STITCH
CH20	3'-O-Acetylsaikosaponin D_qt	EARS2	0.27	STITCH
CH20	3'-O-Acetylsaikosaponin D_qt	TOP3A	0.256	STITCH
CH20	3'-O-Acetylsaikosaponin D_qt	CPVL	0.226	STITCH
CH20	3'-O-Acetylsaikosaponin D_qt	CTSA	0.226	STITCH
CH20	3'-O-Acetylsaikosaponin D_qt	TOP3B	0.223	STITCH
CH20	3'-O-Acetylsaikosaponin D_qt	ESPL1	0.19	STITCH
CH20	3'-O-Acetylsaikosaponin D_qt	SCPEP1	0.168	STITCH
CH20	3'-O-Acetylsaikosaponin D_qt	FASN	0.167	STITCH
CH20	3'-O-Acetylsaikosaponin D_qt	BMP4	0.15	STITCH
CH20	3'-O-Acetylsaikosaponin D_qt	BAX	0.15	STITCH
CH20	3'-O-Acetylsaikosaponin D_qt	ACTA2	0.15	STITCH
CH20	3'-O-Acetylsaikosaponin D_qt	BCL2	0.15	STITCH
CH13	Fraxetin	COX10	0.257	STITCH
CH13	Fraxetin	SLC45A1	0.254	STITCH
CH13	Fraxetin	SLC45A4	0.254	STITCH
CH13	Fraxetin	SLC45A3	0.254	STITCH
CH13	Fraxetin	SLC45A2	0.254	STITCH
CH13	Fraxetin	ABCG2	0.216	STITCH
CH13	Fraxetin	GBA	0.17	STITCH
CH13	Fraxetin	CES4A	0.165	STITCH
CH13	Fraxetin	CA9	0.159	STITCH
CH13	Fraxetin	RPE	0.154	STITCH
CH14	esculetin	UGT2B15	0.761	STITCH
CH14	esculetin	COMT	0.7	STITCH
CH14	esculetin	TP53	0.7	STITCH
CH14	esculetin	MAPK14	0.7	STITCH
CH14	esculetin	MAPK3	0.7	STITCH
CH14	esculetin	MAPK8	0.7	STITCH
CH14	esculetin	MAPK1	0.7	STITCH
CH14	esculetin	AKT1	0.7	STITCH
CH14	esculetin	METTL11B	0.292	STITCH
CH14	esculetin	ASMTL	0.292	STITCH
CH14	esculetin	ASMT	0.292	STITCH
CH14	esculetin	NTMT1	0.292	STITCH
CH14	esculetin	TYSND1	0.256	STITCH
CH14	esculetin	THNSL1	0.254	STITCH
CH14	esculetin	CA12	0.237	STITCH
CH14	esculetin	XDH	0.235	STITCH
CH14	esculetin	CA7	0.229	STITCH
CH14	esculetin	UGT2B28	0.227	STITCH
CH14	esculetin	UGT2B4	0.227	STITCH
CH14	esculetin	UGT3A1	0.227	STITCH
CH14	esculetin	UGT3A2	0.227	STITCH
CH14	esculetin	UGT1A6	0.227	STITCH
CH14	esculetin	UGT2B17	0.227	STITCH
CH14	esculetin	UGT8	0.227	STITCH
CH14	esculetin	UGT2B7	0.227	STITCH
CH14	esculetin	UGT2A1	0.227	STITCH
CH14	esculetin	UGT2A3	0.227	STITCH
CH14	esculetin	UGT1A1	0.227	STITCH
CH14	esculetin	CA14	0.226	STITCH
CH14	esculetin	CA5A	0.225	STITCH
CH14	esculetin	TYR	0.217	STITCH
CH14	esculetin	CA1	0.216	STITCH
CH15	Herniarin	CA6	0.326	STITCH
CH15	Herniarin	CA4	0.326	STITCH
CH15	Herniarin	CUX1	0.308	STITCH
CH15	Herniarin	CUX2	0.308	STITCH
CH15	Herniarin	CA5B	0.306	STITCH
CH15	Herniarin	CA10	0.28	STITCH
CH15	Herniarin	CA2	0.28	STITCH
CH15	Herniarin	CA13	0.28	STITCH
CH15	Herniarin	PTPRG	0.28	STITCH
CH15	Herniarin	CA11	0.28	STITCH
CH15	Herniarin	CA3	0.28	STITCH
CH15	Herniarin	CA8	0.28	STITCH
CH15	Herniarin	MBTPS1	0.249	STITCH
CH15	Herniarin	MC1R	0.239	STITCH
CH15	Herniarin	PTPRZ1	0.216	STITCH
CH15	Herniarin	MCM8	0.208	STITCH
CH15	Herniarin	TAT	0.205	STITCH
CH15	Herniarin	PREPL	0.196	STITCH
CH15	Herniarin	THOP1	0.19	STITCH
CH15	Herniarin	PCSK5	0.185	STITCH
CH15	Herniarin	PCSK7	0.185	STITCH
CH15	Herniarin	DPF2	0.185	STITCH
CH15	Herniarin	PCSK2	0.185	STITCH
CH15	Herniarin	PCSK6	0.185	STITCH
CH15	Herniarin	PCSK4	0.185	STITCH
CH15	Herniarin	PCSK1	0.185	STITCH
CH15	Herniarin	FURIN	0.185	STITCH
CH15	Herniarin	ONECUT2	0.181	STITCH
CH15	Herniarin	CERK	0.181	STITCH
CH15	Herniarin	ONECUT1	0.181	STITCH
CH15	Herniarin	ONECUT3	0.181	STITCH
CH15	Herniarin	CAPN6	0.179	STITCH
CH15	Herniarin	PCSK9	0.178	STITCH
CH15	Herniarin	RSPO4	0.178	STITCH
CH15	Herniarin	RSPO1	0.178	STITCH
CH15	Herniarin	RSPO3	0.178	STITCH
CH15	Herniarin	TPP2	0.178	STITCH
CH15	Herniarin	NLN	0.165	STITCH
CH15	Herniarin	CYP3A5	0.16	STITCH
CH15	Herniarin	CYP3A7	0.16	STITCH
CH16	scopoletin	MITF	0.8	STITCH
CH16	scopoletin	FCGR2B	0.334	STITCH
CH16	scopoletin	FCGR2A	0.303	STITCH
CH16	scopoletin	ABCC2	0.297	STITCH
CH16	scopoletin	ABCC9	0.297	STITCH
CH16	scopoletin	ABCC4	0.297	STITCH
CH16	scopoletin	ABCC1	0.297	STITCH
CH16	scopoletin	ABCC3	0.297	STITCH
CH16	scopoletin	ABCC6	0.297	STITCH
CH16	scopoletin	ABCC8	0.297	STITCH
CH16	scopoletin	HHEX	0.268	STITCH
CH16	scopoletin	SLC35A2	0.261	STITCH
CH16	scopoletin	PROSC	0.242	STITCH
CH16	scopoletin	TTC1	0.232	STITCH
CH16	scopoletin	UBL5	0.229	STITCH
CH16	scopoletin	UBE2I	0.205	STITCH
CH16	scopoletin	EDNRB	0.192	STITCH
CH16	scopoletin	SLC9B2	0.187	STITCH
CH16	scopoletin	SLC9A8	0.187	STITCH
CH16	scopoletin	SLC9A7	0.187	STITCH
CH16	scopoletin	SLC9C2	0.187	STITCH
CH16	scopoletin	SLC9A1	0.187	STITCH
CH16	scopoletin	SLC9B1	0.187	STITCH
CH16	scopoletin	SLC9A9	0.187	STITCH
CH16	scopoletin	SLC9A5	0.187	STITCH
CH16	scopoletin	SLC9B1P1	0.187	STITCH
CH16	scopoletin	SLC9A3	0.187	STITCH
CH16	scopoletin	SLC9A4	0.187	STITCH
CH16	scopoletin	SLC9A2	0.187	STITCH
CH16	scopoletin	SLC9C1	0.187	STITCH
CH16	scopoletin	SLC9A6	0.187	STITCH
CH21	Secoisolariciresinol diglucoside	IL1B	0.8	STITCH
CH21	Secoisolariciresinol diglucoside	ERBB2	0.727	STITCH
CH21	Secoisolariciresinol diglucoside	MLLT1	0.553	STITCH
CH21	Secoisolariciresinol diglucoside	CYP19A1	0.462	STITCH
CH21	Secoisolariciresinol diglucoside	ART5	0.377	STITCH
CH21	Secoisolariciresinol diglucoside	NF2	0.34	STITCH
CH21	Secoisolariciresinol diglucoside	SHBG	0.316	STITCH
CH21	Secoisolariciresinol diglucoside	MKI67	0.303	STITCH
CH21	Secoisolariciresinol diglucoside	IGF1R	0.262	STITCH
CH21	Secoisolariciresinol diglucoside	LRTOMT	0.254	STITCH
CH21	Secoisolariciresinol diglucoside	COMTD1	0.254	STITCH
CH21	Secoisolariciresinol diglucoside	TMPRSS11D	0.253	STITCH
CH21	Secoisolariciresinol diglucoside	ADK	0.244	STITCH
CH21	Secoisolariciresinol diglucoside	GRHPR	0.241	STITCH
CH21	Secoisolariciresinol diglucoside	ART1	0.227	STITCH
CH21	Secoisolariciresinol diglucoside	ART4	0.227	STITCH
CH21	Secoisolariciresinol diglucoside	FOXRED1	0.219	STITCH
CH21	Secoisolariciresinol diglucoside	MRPL3	0.217	STITCH
CH21	Secoisolariciresinol diglucoside	EFTUD2	0.202	STITCH
CH21	Secoisolariciresinol diglucoside	EEF2	0.202	STITCH
CH21	Secoisolariciresinol diglucoside	CYP17A1	0.2	STITCH
CH21	Secoisolariciresinol diglucoside	CCT3	0.2	STITCH
CH21	Secoisolariciresinol diglucoside	MUTYH	0.198	STITCH
CH21	Secoisolariciresinol diglucoside	PGR	0.197	STITCH
CH21	Secoisolariciresinol diglucoside	SLC23A2	0.194	STITCH
CH21	Secoisolariciresinol diglucoside	SLC23A3	0.194	STITCH
CH21	Secoisolariciresinol diglucoside	SLC23A1	0.194	STITCH
CH21	Secoisolariciresinol diglucoside	TXNDC9	0.187	STITCH
CH21	Secoisolariciresinol diglucoside	MAK16	0.176	STITCH
CH21	Secoisolariciresinol diglucoside	ENSG00000212884	0.174	STITCH
CH21	Secoisolariciresinol diglucoside	AKR1D1	0.171	STITCH
CH21	Secoisolariciresinol diglucoside	AKR1C3	0.171	STITCH
CH21	Secoisolariciresinol diglucoside	AKR1C1	0.171	STITCH
CH21	Secoisolariciresinol diglucoside	AKR1C2	0.171	STITCH
CH21	Secoisolariciresinol diglucoside	AKR1CL1	0.171	STITCH
CH21	Secoisolariciresinol diglucoside	AKR1C4	0.171	STITCH
CH21	Secoisolariciresinol diglucoside	AKR1E2	0.171	STITCH
CH21	Secoisolariciresinol diglucoside	AKR1A1	0.171	STITCH
CH21	Secoisolariciresinol diglucoside	AKR1B1	0.171	STITCH
CH21	Secoisolariciresinol diglucoside	AKR1B15	0.171	STITCH
CH17	Cyclocumarol	APEX2	0.333	STITCH
CH17	Cyclocumarol	APEX1	0.25	STITCH
CH17	Cyclocumarol	XRCC3	0.24	STITCH
CH17	Cyclocumarol	HNRNPH2	0.197	STITCH
CH17	Cyclocumarol	HNRNPH1	0.197	STITCH
CH17	Cyclocumarol	SARS	0.182	STITCH
CH17	Cyclocumarol	HARS2	0.181	STITCH
CH17	Cyclocumarol	HNRNPF	0.164	STITCH
CH17	Cyclocumarol	HNRNPH3	0.164	STITCH
CH17	Cyclocumarol	VLDLR	0.159	STITCH
CH17	Cyclocumarol	HARS	0.153	STITCH
CH17	Cyclocumarol	ENSG00000269547	0.15	STITCH
CH17	Cyclocumarol	SARS2	0.15	STITCH
CH18	Octalupine	HNMT	0.212	STITCH
CH18	Octalupine	APAF1	0.185	STITCH
CH18	Octalupine	SLC36A2	0.173	STITCH
CH18	Octalupine	PPP1R14B	0.169	STITCH
CH18	Octalupine	MAGEC1	0.166	STITCH
A1	quercetin	MCL1	0.987	STITCH
A1	quercetin	CYP1B1	0.975	STITCH
A1	quercetin	PIM1	0.969	STITCH
A1	quercetin	HCK	0.969	STITCH
A1	quercetin	SLC2A2	0.965	STITCH
A1	quercetin	CYP1A1	0.963	STITCH
A1	quercetin	ATP5B	0.961	STITCH
A1	quercetin	HIBCH	0.958	STITCH
A1	quercetin	STK17B	0.958	STITCH
A1	quercetin	ATP5A1	0.957	STITCH
A1	quercetin	ATP5C1	0.957	STITCH
A1	quercetin	MMP9	0.956	STITCH
A1	quercetin	SIRT1	0.953	STITCH
A1	quercetin	ABCB1	0.953	STITCH
A1	quercetin	CCL2	0.952	STITCH
A1	quercetin	SRC	0.951	STITCH
A1	quercetin	IL6	0.951	STITCH
A1	quercetin	JUN	0.948	STITCH
A1	quercetin	GSTP1	0.945	STITCH
A1	quercetin	PON1	0.944	STITCH
A1	quercetin	AR	0.943	STITCH
A1	quercetin	CSF2	0.938	STITCH
A1	quercetin	PIK3CG	0.934	STITCH
A1	quercetin	HSPA4	0.895	STITCH
A1	quercetin	AOX1	0.892	STITCH
A1	quercetin	HMOX1	0.879	STITCH
A1	quercetin	ALOX12	0.879	STITCH
A1	quercetin	SLC2A4	0.877	STITCH
A2	isorhamnetin	PON2	0.8	STITCH
A2	isorhamnetin	MAPK9	0.733	STITCH
A2	isorhamnetin	PRKCD	0.7	STITCH
A2	isorhamnetin	SOX2	0.339	STITCH
A2	isorhamnetin	RNF113A	0.25	STITCH
A2	isorhamnetin	RNF113B	0.25	STITCH
A2	isorhamnetin	NCOA1	0.23	STITCH
A2	isorhamnetin	ENSG00000261750	0.205	STITCH
A2	isorhamnetin	IST1	0.205	STITCH
A2	isorhamnetin	GNE	0.2	STITCH
A2	isorhamnetin	SMAD7	0.198	STITCH
A2	isorhamnetin	SMAD6	0.198	STITCH
A2	isorhamnetin	UBE3B	0.176	STITCH
A2	isorhamnetin	PGA3	0.173	STITCH
A2	isorhamnetin	NAPSA	0.173	STITCH
A2	isorhamnetin	KIAA1149	0.173	STITCH
A2	isorhamnetin	CTSD	0.173	STITCH
A2	isorhamnetin	BACE2	0.173	STITCH
A2	isorhamnetin	PGA5	0.173	STITCH
A2	isorhamnetin	ENSG00000250644	0.173	STITCH
A2	isorhamnetin	BACE1	0.173	STITCH
A2	isorhamnetin	PGA4	0.173	STITCH
A2	isorhamnetin	CTSE	0.173	STITCH
A2	isorhamnetin	PGC	0.173	STITCH
A2	isorhamnetin	ASNS	0.171	STITCH
A2	isorhamnetin	HEPHL1	0.171	STITCH
A2	isorhamnetin	HEPH	0.171	STITCH
A2	isorhamnetin	CP	0.171	STITCH
A3	kaempferol	CDK1	0.938	STITCH
A3	kaempferol	NR1I2	0.938	STITCH
A3	kaempferol	RPS6KA3	0.88	STITCH
A3	kaempferol	AHR	0.872	STITCH
A3	kaempferol	MMP1	0.815	STITCH
A3	kaempferol	MMP2	0.815	STITCH
A3	kaempferol	STAT3	0.814	STITCH
A3	kaempferol	IGF2	0.8	STITCH
A3	kaempferol	CDK2	0.8	STITCH
A3	kaempferol	PTGES	0.8	STITCH
A3	kaempferol	STAT1	0.8	STITCH
A3	kaempferol	ITGA2	0.8	STITCH
A3	kaempferol	TNFRSF11B	0.8	STITCH
A3	kaempferol	RB1	0.8	STITCH
A3	kaempferol	IL2	0.8	STITCH
A3	kaempferol	CHUK	0.7	STITCH
A3	kaempferol	SLC2A1	0.7	STITCH
A3	kaempferol	H2AFX	0.7	STITCH
A3	kaempferol	DIO2	0.7	STITCH
B2	Psoralen	MAOA	0.812	STITCH
B2	Psoralen	MAOB	0.8	STITCH
B2	Psoralen	KCNC1	0.8	STITCH
B2	Psoralen	UPP2	0.8	STITCH
B2	Psoralen	DCLRE1B	0.795	STITCH
B2	Psoralen	SOD1	0.784	STITCH
B2	Psoralen	ENSG00000258724	0.733	STITCH
B2	Psoralen	PINX1	0.691	STITCH
B2	Psoralen	ZNF238	0.669	STITCH
B2	Psoralen	POT1	0.669	STITCH
B2	Psoralen	WRN	0.66	STITCH
B2	Psoralen	ERCC4	0.607	STITCH
B2	Psoralen	SOD3	0.579	STITCH
B2	Psoralen	TINF2	0.578	STITCH
B2	Psoralen	TERF1	0.57	STITCH
B2	Psoralen	BLM	0.523	STITCH
B2	Psoralen	RCHY1	0.51	STITCH
B2	Psoralen	HIST1H2BN	0.441	STITCH
B2	Psoralen	ERCC1	0.438	STITCH
B2	Psoralen	PRPF19	0.436	STITCH
B2	Psoralen	KPNB1	0.428	STITCH
B2	Psoralen	MSH3	0.417	STITCH
B2	Psoralen	MSH2	0.411	STITCH
B2	Psoralen	PIPOX	0.403	STITCH
B2	Psoralen	CCS	0.401	STITCH
B2	Psoralen	RAD50	0.39	STITCH
B2	Psoralen	XPA	0.38	STITCH
B2	Psoralen	AQR	0.363	STITCH
B2	Psoralen	HTATSF1	0.363	STITCH
B2	Psoralen	MSH6	0.349	STITCH
B2	Psoralen	BCAS2	0.344	STITCH
B2	Psoralen	PRPF31	0.343	STITCH
B2	Psoralen	EGFR	0.341	STITCH
B2	Psoralen	RAD51C	0.341	STITCH
B2	Psoralen	EFEMP1	0.341	STITCH
B2	Psoralen	IFFO2	0.34	STITCH
B2	Psoralen	ENSG00000255275	0.34	STITCH
B2	Psoralen	ENSG00000257767	0.34	STITCH
B2	Psoralen	ENSG00000269469	0.34	STITCH
HQ2	Jaranol	DAK	0.414	STITCH
HQ2	Jaranol	SLC25A26	0.412	STITCH
HQ2	Jaranol	SGK1	0.177	STITCH
HQ3	hederagenin	SLCO1B3	0.359	STITCH
HQ3	hederagenin	IPO8	0.276	STITCH
HQ3	hederagenin	IPO7	0.276	STITCH
HQ3	hederagenin	ABHD16A	0.265	STITCH
HQ3	hederagenin	SLCO1B1	0.235	STITCH
HQ3	hederagenin	SQLE	0.215	STITCH
HQ3	hederagenin	HPD	0.187	STITCH
HQ3	hederagenin	HPDL	0.187	STITCH
HQ3	hederagenin	HAND1	0.184	STITCH
HQ3	hederagenin	SCP2D1	0.178	STITCH
HQ3	hederagenin	STOML1	0.178	STITCH
HQ3	hederagenin	SCP2	0.178	STITCH
HQ3	hederagenin	TSN	0.177	STITCH
HQ5	3,9-di-O-methylnissolin	ADRA2B	0.173	STITCH
HQ6	9,10-dimethoxypterocarpan-3-O-β-D-glucoside	CNTN3	0.256	STITCH
HQ6	9,10-dimethoxypterocarpan-3-O-β-D-glucoside	ATP2C1	0.198	STITCH
HQ6	9,10-dimethoxypterocarpan-3-O-β-D-glucoside	FOXG1	0.161	STITCH
HQ8	Bifendate	PTHLH	0.697	STITCH
HQ8	Bifendate	HOXD13	0.683	STITCH
HQ8	Bifendate	F8	0.512	STITCH
HQ8	Bifendate	FLNA	0.409	STITCH
HQ8	Bifendate	HABP2	0.4	STITCH
HQ8	Bifendate	F5	0.308	STITCH
HQ8	Bifendate	HOXA13	0.294	STITCH
HQ8	Bifendate	B9D2	0.274	STITCH
HQ8	Bifendate	HOXD3	0.263	STITCH
HQ8	Bifendate	CAMLG	0.257	STITCH
HQ8	Bifendate	TEP1	0.25	STITCH
HQ8	Bifendate	VPS45	0.249	STITCH
HQ8	Bifendate	TCTN3	0.247	STITCH
HQ8	Bifendate	CC2D2A	0.247	STITCH
HQ8	Bifendate	TTC8	0.244	STITCH
HQ8	Bifendate	HOXD10	0.24	STITCH
HQ8	Bifendate	BBS9	0.238	STITCH
HQ8	Bifendate	EVX2	0.233	STITCH
HQ8	Bifendate	MKS1	0.232	STITCH
HQ8	Bifendate	EPO	0.232	STITCH
HQ8	Bifendate	HOXD12	0.232	STITCH
HQ8	Bifendate	SRSF4	0.227	STITCH
HQ8	Bifendate	SRSF5	0.227	STITCH
HQ8	Bifendate	TMEM216	0.227	STITCH
HQ8	Bifendate	SRSF6	0.227	STITCH
HQ8	Bifendate	TCTN1	0.225	STITCH
HQ8	Bifendate	KIF24	0.224	STITCH
HQ8	Bifendate	VWF	0.217	STITCH
HQ8	Bifendate	RRAGD	0.208	STITCH
HQ8	Bifendate	RRAGC	0.208	STITCH
HQ8	Bifendate	FBF1	0.202	STITCH
HQ8	Bifendate	ADRB1	0.201	STITCH
HQ8	Bifendate	F9	0.201	STITCH
HQ8	Bifendate	ACE	0.199	STITCH
HQ8	Bifendate	BBS10	0.198	STITCH
HQ8	Bifendate	HOXD9	0.197	STITCH
HQ8	Bifendate	CEP72	0.193	STITCH
HQ8	Bifendate	IFT122	0.191	STITCH
HQ8	Bifendate	EFNA5	0.187	STITCH
HQ8	Bifendate	CC2D2B	0.187	STITCH
HQ8	Bifendate	C10orf131	0.187	STITCH
HQ8	Bifendate	SLITRK2	0.185	STITCH
HQ8	Bifendate	CHAF1B	0.185	STITCH
HQ8	Bifendate	NID2	0.184	STITCH
HQ8	Bifendate	FAM3B	0.184	STITCH
HQ8	Bifendate	NID1	0.184	STITCH
HQ8	Bifendate	B9D1	0.18	STITCH
HQ9	formononetin	PDE4A	0.8	STITCH
HQ9	formononetin	TBXAS1	0.272	STITCH
HQ9	formononetin	CYP3A43	0.272	STITCH
HQ9	formononetin	PSMA7	0.214	STITCH
HQ9	formononetin	PSMA8	0.214	STITCH
HQ9	formononetin	TSC1	0.209	STITCH
HQ9	formononetin	DVL2	0.207	STITCH
HQ9	formononetin	DVL1	0.2	STITCH
HQ9	formononetin	AXIN1	0.174	STITCH
HQ9	formononetin	PLIN2	0.173	STITCH
HQ9	formononetin	CTDNEP1	0.172	STITCH
HQ9	formononetin	LBH	0.164	STITCH
HQ9	formononetin	TCF3	0.164	STITCH
HQ9	formononetin	PDF	0.16	STITCH
HQ9	formononetin	CTNNB1	0.159	STITCH
HQ9	formononetin	ARG1	0.156	STITCH
HQ9	formononetin	HNF4A	0.156	STITCH
HQ9	formononetin	HSD17B6	0.155	STITCH
HQ9	formononetin	EXOSC10	0.154	STITCH
HQ10	isoflavanone	MAP2K4	0.402	STITCH
HQ10	isoflavanone	CHKB	0.326	STITCH
HQ10	isoflavanone	CHKB-CPT1B	0.326	STITCH
HQ10	isoflavanone	CHKA	0.326	STITCH
HQ10	isoflavanone	ETNK2	0.326	STITCH
HQ10	isoflavanone	ETNK1	0.326	STITCH
HQ10	isoflavanone	GPCPD1	0.221	STITCH
HQ10	isoflavanone	SCAMP5	0.214	STITCH
HQ10	isoflavanone	SCAMP4	0.214	STITCH
HQ10	isoflavanone	SCAMP3	0.214	STITCH
HQ10	isoflavanone	SCAMP2	0.214	STITCH
HQ10	isoflavanone	AADACL2	0.176	STITCH
HQ10	isoflavanone	AADACL4	0.176	STITCH
HQ10	isoflavanone	AADAC	0.176	STITCH
HQ10	isoflavanone	AFMID	0.176	STITCH
HQ10	isoflavanone	LIPE	0.176	STITCH
HQ10	isoflavanone	NCEH1	0.176	STITCH
HQ10	isoflavanone	AADACL3	0.176	STITCH
HQ10	isoflavanone	DIP2A	0.175	STITCH
HQ10	isoflavanone	DIP2C	0.175	STITCH
HQ10	isoflavanone	DIP2B	0.175	STITCH
HQ10	isoflavanone	ACSF2	0.175	STITCH
HQ10	isoflavanone	ADAT1	0.173	STITCH
HQ10	isoflavanone	PDK3	0.166	STITCH
HQ10	isoflavanone	KPNA1	0.166	STITCH
HQ10	isoflavanone	KPNA4	0.166	STITCH
HQ10	isoflavanone	KPNA6	0.166	STITCH
HQ10	isoflavanone	PDK2	0.166	STITCH
HQ10	isoflavanone	PDK4	0.166	STITCH
HQ10	isoflavanone	SPAG6	0.166	STITCH
HQ10	isoflavanone	BCKDK	0.166	STITCH
HQ10	isoflavanone	KPNA3	0.166	STITCH
HQ10	isoflavanone	KPNA5	0.166	STITCH
HQ10	isoflavanone	PDK1	0.166	STITCH
HQ10	isoflavanone	KPNA7	0.166	STITCH
HQ10	isoflavanone	KPNA2	0.166	STITCH
HQ11	Calycosin	BLVRB	0.845	STITCH
HQ11	Calycosin	PNPO	0.281	STITCH
HQ11	Calycosin	ABHD14B	0.272	STITCH
HQ11	Calycosin	NKIRAS2	0.244	STITCH
HQ11	Calycosin	RASL11A	0.226	STITCH
HQ11	Calycosin	TAGLN2	0.222	STITCH
HQ11	Calycosin	NBL1	0.219	STITCH
HQ11	Calycosin	RASL11B	0.218	STITCH
HQ11	Calycosin	DIRAS1	0.206	STITCH
HQ11	Calycosin	NKIRAS1	0.197	STITCH
HQ11	Calycosin	DIRAS2	0.192	STITCH
HQ11	Calycosin	RASL12	0.19	STITCH
HQ11	Calycosin	RASD1	0.19	STITCH
HQ11	Calycosin	ALOX15	0.19	STITCH
HQ11	Calycosin	PLA2G4A	0.17	STITCH
HQ11	Calycosin	RERGL	0.157	STITCH
HQ11	Calycosin	UBE3A	0.15	STITCH
HQ11	Calycosin	CDKN2D	0.15	STITCH
HQ11	Calycosin	STIP1	0.15	STITCH
HQ11	Calycosin	PRDX2	0.15	STITCH
HQ11	Calycosin	MCM6	0.15	STITCH
HQ11	Calycosin	PEBP1	0.15	STITCH
HQ11	Calycosin	ERP29	0.15	STITCH
HQ11	Calycosin	CCNB1	0.15	STITCH
HQ11	Calycosin	RAD9A	0.15	STITCH
HQ11	Calycosin	KRT1	0.15	STITCH
HQ11	Calycosin	LASP1	0.15	STITCH
HQ11	Calycosin	CDKN1A	0.15	STITCH
HQ11	Calycosin	CCND3	0.15	STITCH
HQ11	Calycosin	CDKN1C	0.15	STITCH
HQ11	Calycosin	CCNG1	0.15	STITCH
HQ11	Calycosin	SKP1	0.15	STITCH
HQ11	Calycosin	PRDX1	0.15	STITCH
HQ11	Calycosin	CDK7	0.15	STITCH
HQ11	Calycosin	PGAM1	0.15	STITCH
HQ11	Calycosin	SKP2	0.15	STITCH
HQ12	FA	DHFR	0.96	STITCH
HQ12	FA	MTHFR	0.937	STITCH
HQ12	FA	TYMS	0.924	STITCH
HQ12	FA	DNMT1	0.819	STITCH
HQ12	FA	SERPINE1	0.818	STITCH
HQ12	FA	BIRC3	0.8	STITCH
HQ12	FA	HES5	0.786	STITCH
HQ12	FA	GART	0.76	STITCH
HQ12	FA	SLC19A1	0.681	STITCH
HQ12	FA	ZNF354A	0.578	STITCH
HQ12	FA	NCKAP1L	0.575	STITCH
HQ12	FA	GGH	0.565	STITCH
HQ12	FA	ALAS2	0.525	STITCH
HQ12	FA	ZNF354B	0.51	STITCH
HQ12	FA	SLC46A1	0.496	STITCH
HQ12	FA	ALX1	0.479	STITCH
HQ12	FA	PEMT	0.464	STITCH
HQ12	FA	FPGS	0.456	STITCH
HQ12	FA	VANGL1	0.443	STITCH
HQ12	FA	AGMO	0.434	STITCH
HQ12	FA	GLRX5	0.43	STITCH
HQ12	FA	MTR	0.352	STITCH
HQ12	FA	CHDH	0.346	STITCH
HQ12	FA	PRPS1	0.346	STITCH
HQ12	FA	PRPS2	0.346	STITCH
HQ12	FA	SHMT1	0.329	STITCH
HQ12	FA	SHMT2	0.321	STITCH
HQ12	FA	VANGL2	0.319	STITCH
HQ12	FA	FOLR2	0.317	STITCH
HQ12	FA	FOLR1	0.314	STITCH
HQ12	FA	YTHDC2	0.313	STITCH
HQ12	FA	QDPR	0.311	STITCH
HQ12	FA	MTHFD1	0.31	STITCH
HQ12	FA	CBS	0.304	STITCH
HQ12	FA	DHX29	0.303	STITCH
HQ12	FA	TDRD9	0.303	STITCH
HQ12	FA	DHX57	0.303	STITCH
HQ12	FA	DHX9	0.303	STITCH
HQ12	FA	DHX36	0.303	STITCH
HQ12	FA	DHX30	0.303	STITCH
HQ12	FA	DMGDH	0.302	STITCH
HQ12	FA	PCGF2	0.3	STITCH
HQ12	FA	LEFTY2	0.294	STITCH
HQ12	FA	GIF	0.29	STITCH
HQ16	13-hydroxy-9,11-octadecadienoic acid	PRKCA	0.818	STITCH
HQ16	13-hydroxy-9,11-octadecadienoic acid	PRKCG	0.818	STITCH
HQ16	13-hydroxy-9,11-octadecadienoic acid	ALOX15B	0.493	STITCH
HQ16	13-hydroxy-9,11-octadecadienoic acid	LPP	0.466	STITCH
HQ16	13-hydroxy-9,11-octadecadienoic acid	SERPINF2	0.435	STITCH
HQ16	13-hydroxy-9,11-octadecadienoic acid	SERPINB10	0.435	STITCH
HQ16	13-hydroxy-9,11-octadecadienoic acid	SERPINB1	0.435	STITCH
HQ16	13-hydroxy-9,11-octadecadienoic acid	SERPINB3	0.435	STITCH
HQ16	13-hydroxy-9,11-octadecadienoic acid	SERPINE3	0.435	STITCH
HQ16	13-hydroxy-9,11-octadecadienoic acid	AGT	0.435	STITCH
HQ16	13-hydroxy-9,11-octadecadienoic acid	SERPINA7	0.435	STITCH
HQ16	13-hydroxy-9,11-octadecadienoic acid	SERPINB8	0.435	STITCH
HQ16	13-hydroxy-9,11-octadecadienoic acid	SERPINB12	0.435	STITCH
HQ16	13-hydroxy-9,11-octadecadienoic acid	SERPINB4	0.435	STITCH
HQ16	13-hydroxy-9,11-octadecadienoic acid	SERPINE2	0.435	STITCH
HQ16	13-hydroxy-9,11-octadecadienoic acid	SERPINB9	0.435	STITCH
HQ16	13-hydroxy-9,11-octadecadienoic acid	SERPINA6	0.435	STITCH
HQ16	13-hydroxy-9,11-octadecadienoic acid	SERPINA1	0.435	STITCH
HQ16	13-hydroxy-9,11-octadecadienoic acid	SERPINA12	0.435	STITCH
HQ16	13-hydroxy-9,11-octadecadienoic acid	SERPINA5	0.435	STITCH
HQ16	13-hydroxy-9,11-octadecadienoic acid	SERPINH1	0.435	STITCH
HQ16	13-hydroxy-9,11-octadecadienoic acid	SERPINB2	0.435	STITCH
HQ16	13-hydroxy-9,11-octadecadienoic acid	HMSD	0.435	STITCH
HQ16	13-hydroxy-9,11-octadecadienoic acid	SERPINA11	0.435	STITCH
HQ16	13-hydroxy-9,11-octadecadienoic acid	SERPINB5	0.435	STITCH
HQ16	13-hydroxy-9,11-octadecadienoic acid	SERPINB7	0.435	STITCH
HQ16	13-hydroxy-9,11-octadecadienoic acid	SERPING1	0.435	STITCH
HQ16	13-hydroxy-9,11-octadecadienoic acid	SERPIND1	0.435	STITCH
HQ16	13-hydroxy-9,11-octadecadienoic acid	SERPINA4	0.435	STITCH
HQ16	13-hydroxy-9,11-octadecadienoic acid	SERPINB6	0.435	STITCH
HQ16	13-hydroxy-9,11-octadecadienoic acid	SERPINC1	0.435	STITCH
HQ16	13-hydroxy-9,11-octadecadienoic acid	SERPINI1	0.435	STITCH
HQ16	13-hydroxy-9,11-octadecadienoic acid	SERPINF1	0.435	STITCH
HQ16	13-hydroxy-9,11-octadecadienoic acid	SERPINB13	0.435	STITCH
HQ16	13-hydroxy-9,11-octadecadienoic acid	SERPINI2	0.435	STITCH
HQ16	13-hydroxy-9,11-octadecadienoic acid	SERPINA3	0.435	STITCH
HQ16	13-hydroxy-9,11-octadecadienoic acid	SERPINA9	0.435	STITCH
HQ16	13-hydroxy-9,11-octadecadienoic acid	SERPINA10	0.435	STITCH
HQ16	13-hydroxy-9,11-octadecadienoic acid	CD36	0.416	STITCH
HQ16	13-hydroxy-9,11-octadecadienoic acid	TRIP6	0.353	STITCH
HQ16	13-hydroxy-9,11-octadecadienoic acid	MTNR1A	0.32	STITCH
HQ16	13-hydroxy-9,11-octadecadienoic acid	LOX	0.313	STITCH
HQ16	13-hydroxy-9,11-octadecadienoic acid	PPARG	0.273	STITCH
HQ21	astragalosideⅢ	TTC3	0.172	STITCH
HQ21	astragalosideⅢ	DDX39B	0.169	STITCH
HQ22	2-(Chloromethyl)-4-(4-Nitrophenyl)-1,3-Thiazole	SELP	0.8	STITCH
HQ22	2-(Chloromethyl)-4-(4-Nitrophenyl)-1,3-Thiazole	APC	0.295	STITCH
HQ22	2-(Chloromethyl)-4-(4-Nitrophenyl)-1,3-Thiazole	CD40	0.271	STITCH
HQ22	2-(Chloromethyl)-4-(4-Nitrophenyl)-1,3-Thiazole	APC2	0.256	STITCH
HQ22	2-(Chloromethyl)-4-(4-Nitrophenyl)-1,3-Thiazole	ATF6B	0.242	STITCH
HQ22	2-(Chloromethyl)-4-(4-Nitrophenyl)-1,3-Thiazole	ATF6	0.242	STITCH
HQ22	2-(Chloromethyl)-4-(4-Nitrophenyl)-1,3-Thiazole	ENSG00000258864	0.224	STITCH
HQ22	2-(Chloromethyl)-4-(4-Nitrophenyl)-1,3-Thiazole	CD80	0.209	STITCH
HQ22	2-(Chloromethyl)-4-(4-Nitrophenyl)-1,3-Thiazole	PSEN2	0.19	STITCH
HQ22	2-(Chloromethyl)-4-(4-Nitrophenyl)-1,3-Thiazole	FLT1	0.19	STITCH
HQ22	2-(Chloromethyl)-4-(4-Nitrophenyl)-1,3-Thiazole	PSEN1	0.19	STITCH
HQ22	2-(Chloromethyl)-4-(4-Nitrophenyl)-1,3-Thiazole	ANKRD42	0.184	STITCH
HQ22	2-(Chloromethyl)-4-(4-Nitrophenyl)-1,3-Thiazole	CD86	0.171	STITCH
HQ22	2-(Chloromethyl)-4-(4-Nitrophenyl)-1,3-Thiazole	GBF1	0.166	STITCH
HQ22	2-(Chloromethyl)-4-(4-Nitrophenyl)-1,3-Thiazole	GOT2	0.164	STITCH
HQ22	2-(Chloromethyl)-4-(4-Nitrophenyl)-1,3-Thiazole	GOT1	0.164	STITCH
HQ22	2-(Chloromethyl)-4-(4-Nitrophenyl)-1,3-Thiazole	GOT1L1	0.164	STITCH
HQ22	2-(Chloromethyl)-4-(4-Nitrophenyl)-1,3-Thiazole	C4B	0.155	STITCH
HQ22	2-(Chloromethyl)-4-(4-Nitrophenyl)-1,3-Thiazole	C4A	0.155	STITCH
DG12	cis-ligustilide	ASNSD1	0.202	STITCH
DG12	cis-ligustilide	CDCA7	0.195	STITCH
DG12	cis-ligustilide	C14orf182	0.187	STITCH
DG12	cis-ligustilide	TMEM164	0.184	STITCH
DG12	cis-ligustilide	RERG	0.177	STITCH
DG12	cis-ligustilide	MYBL1	0.172	STITCH
DG3	(3S)-3-butyl-3H-isobenzofuran-1-one	DYRK1A	0.168	STITCH
DG3	(3S)-3-butyl-3H-isobenzofuran-1-one	SLC7A11	0.167	STITCH
DG3	(3S)-3-butyl-3H-isobenzofuran-1-one	HTRA2	0.15	STITCH
DG13	3-Butylidene-7-hydroxyphthalide	RPS21	0.214	STITCH
DG13	3-Butylidene-7-hydroxyphthalide	TNFRSF6B	0.19	STITCH
DG13	3-Butylidene-7-hydroxyphthalide	TARBP2	0.153	STITCH
DG14	senkyunolide-D	ABRA	0.233	STITCH
DG14	senkyunolide-D	ABRACL	0.184	STITCH
DG15	senkyunolide-E	PAF1	0.266	STITCH
DG15	senkyunolide-E	ISCU	0.172	STITCH
DG15	senkyunolide-E	TSEN54	0.169	STITCH
DG4	FERULIC ACID (CIS)	CYCS	0.818	STITCH
DG4	FERULIC ACID (CIS)	ERVFRD-1	0.809	STITCH
DG4	FERULIC ACID (CIS)	CXCL2	0.657	STITCH
DG4	FERULIC ACID (CIS)	CXCL3	0.657	STITCH
DG4	FERULIC ACID (CIS)	CXCL1	0.629	STITCH
DG4	FERULIC ACID (CIS)	TMEM30A	0.449	STITCH
DG4	FERULIC ACID (CIS)	TMEM30B	0.449	STITCH
DG4	FERULIC ACID (CIS)	ERVW-1	0.443	STITCH
DG4	FERULIC ACID (CIS)	TMEM30C	0.427	STITCH
DG4	FERULIC ACID (CIS)	MRPL12	0.319	STITCH
DG4	FERULIC ACID (CIS)	GLUD2	0.314	STITCH
DG4	FERULIC ACID (CIS)	GLUD1	0.314	STITCH
DG4	FERULIC ACID (CIS)	SPICE1	0.296	STITCH
DG4	FERULIC ACID (CIS)	PRKAG2	0.287	STITCH
DG4	FERULIC ACID (CIS)	PRKAG3	0.287	STITCH
DG4	FERULIC ACID (CIS)	IMPDH1	0.287	STITCH
DG4	FERULIC ACID (CIS)	PRKAG1	0.287	STITCH
DG4	FERULIC ACID (CIS)	IMPDH2	0.287	STITCH
DG4	FERULIC ACID (CIS)	GSK3A	0.277	STITCH
DG4	FERULIC ACID (CIS)	GSK3B	0.277	STITCH
DG4	FERULIC ACID (CIS)	ENSG00000268643	0.277	STITCH
DG4	FERULIC ACID (CIS)	MTHFD1L	0.267	STITCH
DG4	FERULIC ACID (CIS)	bA251O17.4	0.267	STITCH
DG4	FERULIC ACID (CIS)	XYLB	0.241	STITCH
DG4	FERULIC ACID (CIS)	CLYBL	0.23	STITCH
DG4	FERULIC ACID (CIS)	TFPI	0.202	STITCH
DG4	FERULIC ACID (CIS)	PPEF2	0.199	STITCH
DG4	FERULIC ACID (CIS)	PPP4C	0.199	STITCH
DG4	FERULIC ACID (CIS)	PPP3CA	0.199	STITCH
DG4	FERULIC ACID (CIS)	PPP2CB	0.199	STITCH
DG4	FERULIC ACID (CIS)	PPP2CA	0.199	STITCH
DG4	FERULIC ACID (CIS)	PPP5C	0.199	STITCH
DG4	FERULIC ACID (CIS)	PPP5D1	0.199	STITCH
DG4	FERULIC ACID (CIS)	PPP3CB	0.199	STITCH
DG4	FERULIC ACID (CIS)	PPP3CC	0.199	STITCH
DG4	FERULIC ACID (CIS)	PPEF1	0.199	STITCH
DG4	FERULIC ACID (CIS)	NMT1	0.196	STITCH
DG4	FERULIC ACID (CIS)	NMT2	0.196	STITCH
DG5	vanillin	TRPV3	0.818	STITCH
DG5	vanillin	KCNK3	0.8	STITCH
DG5	vanillin	CD244	0.298	STITCH
DG5	vanillin	CD8A	0.282	STITCH
DG5	vanillin	CD4	0.259	STITCH
DG5	vanillin	EPC1	0.242	STITCH
DG5	vanillin	IL2RA	0.239	STITCH
DG5	vanillin	NOA1	0.239	STITCH
DG5	vanillin	SULT6B1	0.228	STITCH
DG5	vanillin	GCLM	0.222	STITCH
DG5	vanillin	SLC2A13	0.22	STITCH
DG5	vanillin	EPC2	0.216	STITCH
DG5	vanillin	DPM1	0.212	STITCH
DG5	vanillin	TASP1	0.203	STITCH
DG5	vanillin	ASRGL1	0.203	STITCH
DG5	vanillin	PPM1L	0.2	STITCH
DG5	vanillin	MMP17	0.199	STITCH
DG5	vanillin	MMP15	0.199	STITCH
DG5	vanillin	PGK2	0.198	STITCH
DG5	vanillin	PGK1	0.198	STITCH
DG5	vanillin	OR51E2	0.196	STITCH
DG5	vanillin	CCBL1	0.194	STITCH
DG5	vanillin	CCBL2	0.194	STITCH
DG5	vanillin	BATF	0.193	STITCH
DG5	vanillin	CNGA2	0.193	STITCH
DG16	4-Methyl-6-hepten-3-one	AQP5	0.224	STITCH
DG16	4-Methyl-6-hepten-3-one	TFF1	0.222	STITCH
DG16	4-Methyl-6-hepten-3-one	NCOA2	0.222	STITCH
DG16	4-Methyl-6-hepten-3-one	ACRV1	0.215	STITCH
DG16	4-Methyl-6-hepten-3-one	OFD1	0.186	STITCH
DG17	o-Acetyl-p-cresol	PAPD7	0.353	STITCH
DG17	o-Acetyl-p-cresol	CISH	0.296	STITCH
DG17	o-Acetyl-p-cresol	GABBR2	0.283	STITCH
DG17	o-Acetyl-p-cresol	AGFG1	0.261	STITCH
DG17	o-Acetyl-p-cresol	SRD5A1	0.251	STITCH
DG17	o-Acetyl-p-cresol	AGFG2	0.227	STITCH
DG17	o-Acetyl-p-cresol	MRPL44	0.211	STITCH
DG17	o-Acetyl-p-cresol	NFU1	0.165	STITCH
DG17	o-Acetyl-p-cresol	ZRANB1	0.162	STITCH
DG17	o-Acetyl-p-cresol	XPR1	0.154	STITCH
DG17	o-Acetyl-p-cresol	PSTPIP2	0.153	STITCH
DG17	o-Acetyl-p-cresol	HAL	0.153	STITCH
DG17	o-Acetyl-p-cresol	PAPD5	0.15	STITCH
DG18	bergamotene	IL11	0.233	STITCH
DG18	bergamotene	CPA3	0.221	STITCH
DG18	bergamotene	CPO	0.221	STITCH
DG18	bergamotene	AGBL3	0.221	STITCH
DG18	bergamotene	CPA1	0.221	STITCH
DG18	bergamotene	AGBL4	0.221	STITCH
DG18	bergamotene	AGTPBP1	0.221	STITCH
DG18	bergamotene	AGBL5	0.221	STITCH
DG18	bergamotene	CPB1	0.221	STITCH
DG18	bergamotene	CPA5	0.221	STITCH
DG18	bergamotene	CPA6	0.221	STITCH
DG18	bergamotene	AGBL1	0.221	STITCH
DG18	bergamotene	AGBL2	0.221	STITCH
DG18	bergamotene	CPB2	0.221	STITCH
DG18	bergamotene	CPA4	0.221	STITCH
DG18	bergamotene	CPA2	0.221	STITCH
DG18	bergamotene	SLC47A1	0.217	STITCH
DG18	bergamotene	SLC47A2	0.217	STITCH
DG18	bergamotene	PPCS	0.21	STITCH
DG18	bergamotene	TPI1	0.182	STITCH
DG18	bergamotene	METAP2	0.181	STITCH
DG18	bergamotene	IPP	0.178	STITCH
DG18	bergamotene	SPAG1	0.177	STITCH
DG18	bergamotene	LIN54	0.169	STITCH
DG18	bergamotene	MTL5	0.169	STITCH
DG18	bergamotene	COQ2	0.168	STITCH
DG18	bergamotene	FTSJ3	0.168	STITCH
DG18	bergamotene	MVK	0.167	STITCH
DG18	bergamotene	IL13	0.166	STITCH
DG18	bergamotene	ALOX12B	0.162	STITCH
DG18	bergamotene	ALOXE3	0.162	STITCH
DG18	bergamotene	RPS13	0.161	STITCH
DG18	bergamotene	PPWD1	0.159	STITCH
DG18	bergamotene	DHDDS	0.156	STITCH
DG18	bergamotene	CHRNE	0.156	STITCH
DG19	Isoamylbenzene	NOX4	0.21	STITCH
DG19	Isoamylbenzene	MMAA	0.205	STITCH
DG19	Isoamylbenzene	GPER	0.177	STITCH
DG19	Isoamylbenzene	LOXL1	0.173	STITCH
DG19	Isoamylbenzene	AGTR1	0.152	STITCH
DG20	5-Indolol	LTA4H	0.8	STITCH
DG20	5-Indolol	DMC1	0.637	STITCH
DG20	5-Indolol	RAD51	0.637	STITCH
DG20	5-Indolol	RAD51D	0.637	STITCH
DG20	5-Indolol	RAD51B	0.637	STITCH
DG20	5-Indolol	FEV	0.51	STITCH
DG20	5-Indolol	ZMYM1	0.457	STITCH
DG20	5-Indolol	HTR1A	0.448	STITCH
DG20	5-Indolol	LCMT1	0.443	STITCH
DG20	5-Indolol	LCMT2	0.443	STITCH
DG20	5-Indolol	HTR7	0.372	STITCH
DG20	5-Indolol	SRP72	0.353	STITCH
DG20	5-Indolol	HTR2A	0.345	STITCH
DG20	5-Indolol	ALG13	0.304	STITCH
DG20	5-Indolol	OTUD4	0.304	STITCH
DG20	5-Indolol	OTUD5	0.304	STITCH
DG20	5-Indolol	SLC6A4	0.286	STITCH
DG20	5-Indolol	SRP54	0.255	STITCH
DG20	5-Indolol	EEF1A2	0.252	STITCH
DG20	5-Indolol	EEF1A1	0.252	STITCH
DG20	5-Indolol	SRP9	0.251	STITCH
DG20	5-Indolol	UCHL5	0.234	STITCH
DG20	5-Indolol	PPCDC	0.233	STITCH
DG20	5-Indolol	SRP19	0.229	STITCH
DG20	5-Indolol	GPHN	0.224	STITCH
DG20	5-Indolol	RPS6KB2	0.224	STITCH
DG20	5-Indolol	KAT5	0.224	STITCH
DG20	5-Indolol	RPS6KB1	0.224	STITCH
DG20	5-Indolol	MTOR	0.219	STITCH
DG20	5-Indolol	SMG1	0.219	STITCH
DG20	5-Indolol	KDM2A	0.215	STITCH
DG20	5-Indolol	FBXL6	0.215	STITCH
DG20	5-Indolol	FBXL4	0.215	STITCH
DG20	5-Indolol	FBXL17	0.215	STITCH
DG20	5-Indolol	FBXL19	0.215	STITCH
DG20	5-Indolol	KDM2B	0.215	STITCH
DG20	5-Indolol	LRRC29	0.215	STITCH
DG20	5-Indolol	DDC	0.213	STITCH
DG20	5-Indolol	SLC6A3	0.213	STITCH
DG20	5-Indolol	SLC6A2	0.213	STITCH
DG20	5-Indolol	COLQ	0.204	STITCH
DG20	5-Indolol	BAP1	0.201	STITCH
DG20	5-Indolol	TPSAB1	0.197	STITCH
DG8	isoeugenol	ADCK1	0.342	STITCH
DG8	isoeugenol	ADCK5	0.342	STITCH
DG8	isoeugenol	ERAS	0.292	STITCH
DG8	isoeugenol	TXN	0.283	STITCH
DG8	isoeugenol	DHTKD1	0.235	STITCH
DG8	isoeugenol	OGDH	0.235	STITCH
DG8	isoeugenol	OGDHL	0.235	STITCH
DG8	isoeugenol	TXNDC8	0.227	STITCH
DG8	isoeugenol	NME8	0.227	STITCH
DG8	isoeugenol	TXNDC2	0.227	STITCH
DG8	isoeugenol	OR2AG1	0.227	STITCH
DG8	isoeugenol	TMEM55A	0.219	STITCH
DG8	isoeugenol	ANO2	0.212	STITCH
DG8	isoeugenol	ANO1	0.212	STITCH
DG8	isoeugenol	OR2Y1	0.209	STITCH
DG8	isoeugenol	OR2W3	0.194	STITCH
DG8	isoeugenol	OR2G3	0.194	STITCH
DG8	isoeugenol	ABCB8	0.192	STITCH
DG8	isoeugenol	ABCB10	0.192	STITCH
DG8	isoeugenol	TAP1	0.192	STITCH
DG8	isoeugenol	ENSG00000250264	0.192	STITCH
DG8	isoeugenol	ABCB9	0.192	STITCH
DG8	isoeugenol	TAP2	0.192	STITCH
DG8	isoeugenol	ABCG1	0.19	STITCH
DG8	isoeugenol	ABCG8	0.19	STITCH
DG8	isoeugenol	ABCG4	0.19	STITCH
DG8	isoeugenol	ABCG5	0.19	STITCH
DG8	isoeugenol	ADCK3	0.186	STITCH
DG21	(-)-alpha-Pinene	CER1	0.618	STITCH
DG21	(-)-alpha-Pinene	MED27	0.376	STITCH
DG21	(-)-alpha-Pinene	SHE	0.338	STITCH
DG21	(-)-alpha-Pinene	POLN	0.287	STITCH
DG21	(-)-alpha-Pinene	TARSL2	0.259	STITCH
DG21	(-)-alpha-Pinene	TARS	0.259	STITCH
DG21	(-)-alpha-Pinene	SHD	0.256	STITCH
DG21	(-)-alpha-Pinene	SHB	0.256	STITCH
DG21	(-)-alpha-Pinene	SHF	0.256	STITCH
DG21	(-)-alpha-Pinene	MAGOHB	0.252	STITCH
DG21	(-)-alpha-Pinene	MAGOH	0.252	STITCH
DG21	(-)-alpha-Pinene	MEST	0.25	STITCH
DG21	(-)-alpha-Pinene	TARS2	0.229	STITCH
DG21	(-)-alpha-Pinene	RABGGTA	0.227	STITCH
DG21	(-)-alpha-Pinene	RRM1	0.226	STITCH
DG21	(-)-alpha-Pinene	PYGB	0.219	STITCH
DG21	(-)-alpha-Pinene	PYGL	0.219	STITCH
DG21	(-)-alpha-Pinene	PYGM	0.219	STITCH
DG21	(-)-alpha-Pinene	BCLAF1	0.213	STITCH
DG21	(-)-alpha-Pinene	GMFG	0.2	STITCH
DG21	(-)-alpha-Pinene	GMFB	0.2	STITCH
DG21	(-)-alpha-Pinene	MRPL39	0.197	STITCH
DG21	(-)-alpha-Pinene	UPK2	0.193	STITCH
DG21	(-)-alpha-Pinene	CHEK1	0.19	STITCH
DG21	(-)-alpha-Pinene	LRCH4	0.187	STITCH
DG21	(-)-alpha-Pinene	POLG	0.186	STITCH
DG21	(-)-alpha-Pinene	POLQ	0.186	STITCH
DG21	(-)-alpha-Pinene	MYADM	0.185	STITCH
DG21	(-)-alpha-Pinene	POLR2B	0.178	STITCH
DG21	(-)-alpha-Pinene	ACAT1	0.175	STITCH
DG21	(-)-alpha-Pinene	ACAT2	0.175	STITCH
DG21	(-)-alpha-Pinene	ACAA1	0.175	STITCH
DG21	(-)-alpha-Pinene	HADHB	0.175	STITCH
DG21	(-)-alpha-Pinene	MPC1	0.175	STITCH
DG21	(-)-alpha-Pinene	ACAA2	0.175	STITCH
DG21	(-)-alpha-Pinene	LRCH3	0.17	STITCH
DG21	(-)-alpha-Pinene	ZNF311	0.169	STITCH
DG21	(-)-alpha-Pinene	NTNG1	0.167	STITCH
DG21	(-)-alpha-Pinene	NTNG2	0.167	STITCH
DG21	(-)-alpha-Pinene	RRP12	0.165	STITCH
DG21	(-)-alpha-Pinene	TNPO2	0.164	STITCH
DG21	(-)-alpha-Pinene	TNPO1	0.164	STITCH
DG21	(-)-alpha-Pinene	FNTA	0.161	STITCH
DG21	(-)-alpha-Pinene	ENSG00000254673	0.161	STITCH
DG22	α-angelica lactone	PDCL	0.164	STITCH
DG22	α-angelica lactone	MAEA	0.15	STITCH
DG23	α'-angelica lactone	NQO2	0.191	STITCH
DG23	α'-angelica lactone	NMNAT3	0.161	STITCH
DG23	α'-angelica lactone	NMNAT1	0.161	STITCH
DG23	α'-angelica lactone	NMNAT2	0.161	STITCH
DG10	β-angelica lactone	SIM1	0.212	STITCH
DG10	β-angelica lactone	UGDH	0.212	STITCH
DG10	β-angelica lactone	LSR	0.212	STITCH
DG10	β-angelica lactone	SIM2	0.212	STITCH
DG11	Angelicin	NFKB2	0.8	STITCH
DG11	Angelicin	CNOT2	0.508	STITCH
DG11	Angelicin	CCL4	0.475	STITCH
DG11	Angelicin	SEMA6A	0.337	STITCH
DG11	Angelicin	IKBKB	0.32	STITCH
DG11	Angelicin	ACLY	0.246	STITCH
DG11	Angelicin	SUCLG1	0.246	STITCH
DG11	Angelicin	FAN1	0.245	STITCH
DG11	Angelicin	NFKB1	0.235	STITCH
DG11	Angelicin	CCL4L1	0.233	STITCH
DG11	Angelicin	CCL4L2	0.233	STITCH
DG11	Angelicin	HBG2	0.232	STITCH
DG11	Angelicin	DCLRE1A	0.223	STITCH
DG11	Angelicin	CYB5R4	0.217	STITCH
DG11	Angelicin	PPIB	0.201	STITCH
DG11	Angelicin	PPIC	0.201	STITCH
DG11	Angelicin	HSD17B13	0.198	STITCH
DG11	Angelicin	SDR16C5	0.198	STITCH
DG11	Angelicin	HSD17B11	0.198	STITCH
DG11	Angelicin	RDH10	0.198	STITCH
DG11	Angelicin	DHRS3	0.198	STITCH
DG11	Angelicin	NKTR	0.189	STITCH
DG11	Angelicin	PPIH	0.189	STITCH
DG11	Angelicin	COPA	0.183	STITCH
DG11	Angelicin	GAN	0.179	STITCH
DG11	Angelicin	AMD1	0.175	STITCH
DG11	Angelicin	PPIL2	0.175	STITCH
DG11	Angelicin	PPID	0.171	STITCH
DG11	Angelicin	APRT	0.168	STITCH
DG11	Angelicin	NDUFS8	0.167	STITCH
DG11	Angelicin	PPIL6	0.165	STITCH
DG11	Angelicin	TXK	0.162	STITCH
DG11	Angelicin	POLK	0.151	STITCH
DG11	Angelicin	REV1	0.151	STITCH
KDD1	coptisine	TNFSF11	0.8	STITCH
KDD1	coptisine	PAWR	0.501	STITCH
KDD1	coptisine	XPO1	0.457	STITCH
KDD1	coptisine	ESF1	0.414	STITCH
KDD1	coptisine	RPL5	0.399	STITCH
KDD1	coptisine	TPRA1	0.295	STITCH
KDD1	coptisine	ELP3	0.249	STITCH
KDD1	coptisine	REM1	0.247	STITCH
KDD1	coptisine	CRYZ	0.244	STITCH
KDD1	coptisine	OPRK1	0.239	STITCH
KDD1	coptisine	TGS1	0.227	STITCH
KDD1	coptisine	ADRA1D	0.225	STITCH
KDD1	coptisine	ADRA1B	0.225	STITCH
KDD1	coptisine	CHRM2	0.222	STITCH
KDD1	coptisine	CHRM4	0.222	STITCH
KDD1	coptisine	DUT	0.216	STITCH
KDD1	coptisine	DRD3	0.213	STITCH
KDD1	coptisine	ADRA1A	0.207	STITCH
KDD1	coptisine	LRRK2	0.205	STITCH
KDD1	coptisine	RPL36A	0.204	STITCH
KDD1	coptisine	COL18A1	0.187	STITCH
KDD1	coptisine	CSMD1	0.185	STITCH
KDD1	coptisine	CSMD2	0.185	STITCH
KDD1	coptisine	CSMD3	0.185	STITCH
KDD1	coptisine	SVEP1	0.185	STITCH
KDD1	coptisine	TOMM22	0.184	STITCH
KDD1	coptisine	KCNJ11	0.183	STITCH
KDD1	coptisine	KCNJ8	0.183	STITCH
KDD1	coptisine	LIPG	0.182	STITCH
KDD1	coptisine	A4GALT	0.177	STITCH
KDD1	coptisine	KEL	0.177	STITCH
KDD1	coptisine	LRRK1	0.175	STITCH
KDD1	coptisine	VWCE	0.168	STITCH
KDD1	coptisine	RTL1	0.163	STITCH
KDD1	coptisine	PARS2	0.163	STITCH
KDD1	coptisine	RPL36AL	0.162	STITCH
KDD1	coptisine	ENSG00000257529	0.162	STITCH
KDD1	coptisine	DNMT3A	0.162	STITCH
KDD1	coptisine	COL15A1	0.158	STITCH
KDD1	coptisine	HSPE1	0.156	STITCH
KDD2	stylopine	MPO	0.816	STITCH
KDD3	Oxysanguinarine	SETD1B	0.32	STITCH
KDD4	Fumarine	HRH1	0.8	STITCH
KDD4	Fumarine	KIAA0101	0.8	STITCH
KDD4	Fumarine	F2	0.786	STITCH
KDD4	Fumarine	CNPPD1	0.333	STITCH
KDD4	Fumarine	ABCE1	0.326	STITCH
KDD4	Fumarine	ALKBH1	0.323	STITCH
KDD4	Fumarine	VPS29	0.304	STITCH
KDD4	Fumarine	ABCF2	0.303	STITCH
KDD4	Fumarine	ABCF3	0.303	STITCH
KDD4	Fumarine	F11	0.275	STITCH
KDD4	Fumarine	TMPRSS2	0.275	STITCH
KDD4	Fumarine	ENSG00000184761	0.275	STITCH
KDD4	Fumarine	CTRL	0.275	STITCH
KDD4	Fumarine	MST1	0.275	STITCH
KDD4	Fumarine	TMPRSS13	0.275	STITCH
KDD4	Fumarine	TMPRSS12	0.275	STITCH
KDD4	Fumarine	HPR	0.275	STITCH
KDD4	Fumarine	KLK13	0.275	STITCH
KDD4	Fumarine	CFI	0.275	STITCH
KDD4	Fumarine	ENSG00000244255	0.275	STITCH
KDD4	Fumarine	ENSG00000183292	0.275	STITCH
KDD4	Fumarine	PRSS45	0.275	STITCH
KDD4	Fumarine	KLK8	0.275	STITCH
KDD4	Fumarine	PRSS48	0.275	STITCH
KDD4	Fumarine	KLK11	0.275	STITCH
KDD4	Fumarine	TMPRSS7	0.275	STITCH
KDD4	Fumarine	KLK7	0.275	STITCH
KDD4	Fumarine	CFB	0.275	STITCH
KDD4	Fumarine	PRSS42	0.275	STITCH
KDD4	Fumarine	PRSS46	0.275	STITCH
KDD4	Fumarine	TMPRSS4	0.275	STITCH
KDD4	Fumarine	PRSS58	0.275	STITCH
KDD4	Fumarine	KLK15	0.275	STITCH
KDD4	Fumarine	MST1L	0.275	STITCH
KDD4	Fumarine	MASP2	0.275	STITCH
KDD8	coryincine	ADRA2C	0.978	STITCH
KDD8	coryincine	ADRA2A	0.977	STITCH
KDD8	coryincine	HTR1B	0.947	STITCH
KDD8	coryincine	HTR2B	0.946	STITCH
KDD8	coryincine	HTR1D	0.945	STITCH
KDD8	coryincine	HTR2C	0.853	STITCH
KDD8	coryincine	HTR1F	0.724	STITCH
KDD8	coryincine	DRD2	0.528	STITCH
KDD8	coryincine	HTR1E	0.458	STITCH
KDD8	coryincine	DRD4	0.415	STITCH
KDD8	coryincine	HTR5A	0.26	STITCH
KDD8	coryincine	GLRA1	0.237	STITCH
KDD8	coryincine	GLRA3	0.221	STITCH
KDD8	coryincine	GPR176	0.214	STITCH
KDD8	coryincine	OPRM1	0.214	STITCH
KDD8	coryincine	GPR139	0.214	STITCH
KDD8	coryincine	LPAR2	0.214	STITCH
KDD8	coryincine	LTB4R2	0.214	STITCH
KDD8	coryincine	GRPR	0.214	STITCH
KDD8	coryincine	CXCR4	0.214	STITCH
KDD8	coryincine	GPR135	0.214	STITCH
KDD8	coryincine	QRFPR	0.214	STITCH
KDD8	coryincine	GPR61	0.214	STITCH
KDD8	coryincine	GPR78	0.214	STITCH
KDD8	coryincine	CCR3	0.214	STITCH
KDD8	coryincine	TBXA2R	0.214	STITCH
KDD8	coryincine	ENSG00000269099	0.214	STITCH
KDD8	coryincine	GPR12	0.214	STITCH
KDD8	coryincine	TUBB3	0.214	STITCH
KDD9	isocorynoline	LCAT	0.167	STITCH
KDD9	isocorynoline	MYT1	0.164	STITCH
KDD9	isocorynoline	SI	0.156	STITCH
KDD10	Norsanguinarine	RAC2	0.172	STITCH
KDD12	yuziphine	FAP	0.213	STITCH
KDD13	acetylcorynoline	PSMD12	0.253	STITCH
KDD13	acetylcorynoline	ZFAND2A	0.251	STITCH
KDD13	acetylcorynoline	PSMG4	0.221	STITCH
KDD13	acetylcorynoline	TCEB2	0.218	STITCH
KDD13	acetylcorynoline	PSMD11	0.211	STITCH
KDD13	acetylcorynoline	PSMD6	0.209	STITCH
KDD13	acetylcorynoline	PSMD7	0.19	STITCH
KDD13	acetylcorynoline	ADRM1	0.189	STITCH
KDD13	acetylcorynoline	PSMD10	0.184	STITCH
KDD13	acetylcorynoline	CACUL1	0.184	STITCH
KDD13	acetylcorynoline	CUL1	0.184	STITCH
KDD13	acetylcorynoline	USP18	0.18	STITCH
KDD13	acetylcorynoline	DCAF11	0.179	STITCH
KDD13	acetylcorynoline	PSMB4	0.173	STITCH
KDD13	acetylcorynoline	PSMG3	0.166	STITCH
KDD13	acetylcorynoline	RC3H2	0.162	STITCH
KDD13	acetylcorynoline	RC3H1	0.162	STITCH
KDD13	acetylcorynoline	DCUN1D2	0.159	STITCH
KDD13	acetylcorynoline	DCUN1D1	0.159	STITCH
KDD13	acetylcorynoline	UBE2L3	0.152	STITCH
KDD13	acetylcorynoline	UBE4B	0.15	STITCH
KDD14	tetrahydropalmatine	SIGMAR1	0.677	STITCH
KDD14	tetrahydropalmatine	F3	0.641	STITCH
KDD14	tetrahydropalmatine	DRD5	0.289	STITCH
KDD14	tetrahydropalmatine	CHRM3	0.199	STITCH
KDD14	tetrahydropalmatine	AES	0.164	STITCH
KDD16	Dihydrosanguinarine	S100B	0.794	STITCH
KDD16	Dihydrosanguinarine	ABCB4	0.265	STITCH
KDD16	Dihydrosanguinarine	ABCB11	0.265	STITCH
KDD16	Dihydrosanguinarine	ABCB5	0.265	STITCH
KDD16	Dihydrosanguinarine	CTU2	0.26	STITCH
KDD16	Dihydrosanguinarine	ABCC5	0.254	STITCH
KDD16	Dihydrosanguinarine	ABCC12	0.254	STITCH
KDD16	Dihydrosanguinarine	CFTR	0.254	STITCH
KDD16	Dihydrosanguinarine	ABCC10	0.254	STITCH
KDD16	Dihydrosanguinarine	ABCC11	0.254	STITCH
KDD16	Dihydrosanguinarine	FAM50A	0.238	STITCH
KDD16	Dihydrosanguinarine	FAM50B	0.238	STITCH
KDD16	Dihydrosanguinarine	TAF5	0.23	STITCH
KDD16	Dihydrosanguinarine	ABCF1	0.225	STITCH
KDD16	Dihydrosanguinarine	GAD1	0.22	STITCH
KDD16	Dihydrosanguinarine	ALG1L	0.189	STITCH
KDD16	Dihydrosanguinarine	ALG2	0.189	STITCH
KDD16	Dihydrosanguinarine	GYS1	0.189	STITCH
KDD16	Dihydrosanguinarine	PIGA	0.189	STITCH
KDD16	Dihydrosanguinarine	GYS2	0.189	STITCH
KDD16	Dihydrosanguinarine	ALG11	0.189	STITCH
KDD16	Dihydrosanguinarine	ALG1	0.189	STITCH
KDD16	Dihydrosanguinarine	GBE1	0.179	STITCH
KDD16	Dihydrosanguinarine	SATL1	0.176	STITCH
KDD16	Dihydrosanguinarine	SAT1	0.176	STITCH
KDD17	corynoline	IRGC	0.284	STITCH
KDD17	corynoline	CLASRP	0.218	STITCH
KDD17	corynoline	DDX56	0.189	STITCH
KDD17	corynoline	GSX2	0.186	STITCH
KDD17	corynoline	PPM1B	0.175	STITCH
KDD17	corynoline	PPM1A	0.175	STITCH
KDD17	corynoline	ZBTB20	0.169	STITCH
KDD17	corynoline	SLC39A10	0.157	STITCH
KDD17	corynoline	SLC39A6	0.157	STITCH
KDD17	corynoline	PPM1N	0.155	STITCH
